# Supplementary material for: 2018 Reviewers and Guest Associate Editors
Source: Atypon-hosted journal article supplement (doi:10.1287/mnsc.2019.3283), 2019-02-01
Supplement: mnsc.2019.3283-sm.pdf [file mnsc.2019.3283-sm.pdf]

## 2018 – All Reviewers

-, Sarada, University of Wisconsin–Madison  
Abdallah, Tarek, New York University  
Abdellaoui, Mohammed, HEC Paris  
Abe, Makoto, University of Tokyo  
Abhishek, Vibhanshu, University of California, Irvine  
Abis, Simona, Columbia University  
Abouee-Mehrzi, Hossein, University of Waterloo  
Abraham, Mabel, Columbia University  
Acimovic, Jason, Pennsylvania State University  
Adachi, Takanori, Nagoya University  
Adamopoulos, Panagiotis, Emory University  
Addoum, Jawad, Cornell University  
Adelino, Manuel, Duke University  
Adida, Elodie, University of California, Riverside  
Adjerid, Idris, Virginia Polytechnic Institute and State University  
Adulyasak, Yossiri, HEC Montréal  
Afeche, Philipp, University of Toronto  
Aflaki, Arian, University of Pittsburgh  
Aflaki, Sam, HEC Paris  
Agarwal, Ashish, University of Texas at Austin  
Agarwal, Sumit, Georgetown University  
Agarwal, Vikas, Georgia State University  
Aggarwal, Ishani, Fundação Getulio Vargas  
Aggarwal, Vikas, INSEAD  
Agha, Leila, Dartmouth College  
Aghamolla, Cyrus, University of Minnesota  
Agrawal, Anupam, Texas A&M University  
Agrawal, Ashwini, London School of Economics and Political Science  
Agrawal, Shipra, Columbia University  
Agrawal, Vishal, Georgetown University  
Aguiar, Luis, Institute for Prospective Technological Studies  
Aharoni, Gil, University of Melbourne  
Ahearne, Michael, University of Houston  
Ahern, Kenneth, University of Michigan  
Ahipasaoglu, Selin, Singapore University of Technology and Design  
Ahnert, Toni, Bank of Canada  
Ai, Hengjie, University of Minnesota  
Ai, Wei, University of Michigan  
Aiello, Darren, Brigham Young University  
Akamah, Herita, University of Nebraska–Lincoln  
Akbarpour, Mohammad, Stanford University  
Akbas, Ferhat, University of Illinois at Chicago  
Akca, Yalcin, Melbourne Business School  
Akey, Pat, University of Toronto  
Akins, Brian, Rice University  
Akkas, Arzum, Boston University  
Alan, Yasin, Vanderbilt University  
Albuquerque, Ana, Boston University  
Albuquerque, Paulo, INSEAD  
Alderson, David, Naval Postgraduate School  
Alizamir, Saed, Yale University  
Aljafari, Ruba, University of Pittsburgh  
Allain, Marie-Laure, École polytechnique  
Allen, Eric, University of Southern California  
Alm, James, Tulane University  
Almada-Lobo, Bernardo, University of Porto  
Alonso, Ricardo, London School of Economics and Political Science  
Aloysius, John, University of Arkansas  
Alptekinoglu, Aydin, Pennsylvania State University  
Alter, Adrian, International Monetary Fund  
Althoff, Tim, Stanford University  
Alti, Aydogan, University of Texas at Austin  
Altmann, Steffen, University of Copenhagen  
Altug, Mehmet, George Washington University  
Amaldoss, Wilfred, Duke University  
Amar, Moty, Ono Academic College  
Ambrose, Brent, Pennsylvania State University  
Ambuehl, Sandro, University of Toronto  
Amir, On, University of California, San Diego  
Amiram, Dan, Columbia University  
Amore, Mario Daniele, Bocconi University  
Amorim, Pedro, Instituto de Engenharia de Sistemas e Computadores Tecnologia e Ciencia  
Amromin, Gene, Federal Reserve Bank of Chicago  
An, Li, Tsinghua University  
An, Xudong, Federal Reserve Bank of Philadelphia  
Anagol, Santosh, University of Pennsylvania  
Analytis, Pantelis, Cornell University  
Anand, Gopesh, University of Illinois  
Ananthakrishnan, Uttara, Carnegie Mellon University  
Andersen, Steffen, Copenhagen Business School  
Anderson, Shannon, University of California, Davis  
Andrade Rojas, Mariana, Nanyang Technological University

## 2018 – All Reviewers

Andrei, Daniel, University of California, Los Angeles  
Andrews, Michelle, Emory University  
Andritsos, Dimitrios, HEC Paris  
Angel, James, Georgetown University  
Anily, Shoshana, Tel Aviv University  
Anjos, Fernando, Universidade Nova de Lisboa  
Nova  
Anton, Miguel, IESE Business School  
Antoniou, Constantinos, University of Warwick  
Aobdia, Daniel, Northwestern University  
Aouad, Ali, London Business School  
Apesteguia, Jose, Pompeu Fabra University  
Appel, Gil, University of Southern California  
Appel, Ian, Boston College  
Aragon, George, Arizona State University  
Araman, Victor, American University of Beirut  
Arbatskaya, Maria, Emory University  
Arceo-Gomez, Eva, Centro de Investigacion y Docencia Economicas  
Archak, Nikolay, New York University  
Argyle, Bronson, Brigham Young University  
Arif, Salman, Indiana University  
Arikan, Mazhar, University of Kansas  
Arlotto, Alessandro, Duke University  
Armstrong, Christopher, University of Pennsylvania  
Arnold, Marc, University of St. Gallen  
Arnosti, Nick, Stanford University  
Artz, Martin, Frankfurt School of Finance & Management  
Ascarza, Eva, Columbia University  
Aseri, Manmohan, Carnegie Mellon University  
Ashlagi, Itai, Stanford University  
Ashley, Katherine, Montclair State University  
Askin, Noah, INSEAD  
Asparouhova, Elena, University of Utah  
Aswani, Anil, University of California, Berkeley  
Atahan, Pelin, Özyeğin University  
Atanassov, Julian, University of Nebraska–Lincoln  
Atasoy, Hilal, Temple University  
Atasu, Atalay, Georgia Institute of Technology  
Atmaz, Adem, Purdue University  
Attema, Arthur, Erasmus University  
Audia, Pino, Dartmouth College  
Augenblick, Ned, University of California, Berkeley  
Augustin, Patrick, McGill University  
Auster, Sarah, Bocconi University  
Avadhanula, Vashist, Facebook  
Avdis, Efstathios, University of Alberta  
Aven, Brandy, Carnegie Mellon University  
Avgerinos, Emmanouil, University College London  
Ayabakan, Sezgin, Temple University  
Ayal, Shahar, Interdisciplinary Center Herzliya  
Aydin, Goker, Johns Hopkins University  
Ayer, Turgay, Georgia Institute of Technology  
Ayvaci, Mehmet, University of Texas at Dallas  
Azar, Jose, University of Navarra  
Azevedo, Eduardo, University of Pennsylvania  
Azmat, Ghazala, Sciences Po  
Babenko, Ilona, Arizona State University  
Babina, Tania, Columbia University  
Backus, Mathew, Columbia University  
Badarinza, Cristian, National University of Singapore  
Bae, Kee-Hong, York University  
Baghai, Ramin, Stockholm School of Economics  
Bai, Jennie, Georgetown University  
Bai, John (Jianqiu), Northeastern University  
Bai, Xue, Temple University  
Baisa, Brian, Amherst College  
Baker, Erin, University of Massachusetts, Amherst  
Baker, Nevin, Excela Health  
Baker, Steven, University of Virginia  
Bakshi, Gurdip, University of Maryland, College Park  
Bakshi, Nitin, University of Utah  
Balachander, Subramanian, Purdue University  
Balafoutas, Loukas, University of Innsbruck  
Balakrishnan, Karthik, London Business School  
Balakrishnan, Ramji, University of Iowa  
Balasubramaniam, Vimal, University of Warwick  
Balasubramaniam, Sridhar, University of North Carolina at Chapel Hill  
Baldiga Coffman, Katherine, Harvard Business School  
Balkundi, Prasad, University at Buffalo  
Ball, George, Indiana University  
Ball, Ryan, University of Michigan  
Baloria, Vishal, Boston College  
Balseiro, Santiago, Columbia University  
Balsmeier, Benjamin, ETH Zurich

## 2018 – All Reviewers

Ban, Gah-Yi, London Business School  
Bandi, Chaitanya, Northwestern University  
Bandyopadhyay, Susmita, University of Burdwan  
Banerjee, Ritwik, Indian Institute of Management, Bangalore  
Banerjee, Siddhartha, Cornell University  
Banerjee, Snehal, University of California, San Diego  
Bao, Jack, Federal Reserve Board  
Bao, Yang, Shanghai Jiao Tong University  
Bapna, Ravi, University of Minnesota  
Bapna, Sofia, University of Minnesota  
Barach, Moshe, Georgetown University  
Barankay, Iwan, University of Pennsylvania  
Baranov, Oleg, University of Colorado Boulder  
Barberis, Nicholas, Yale University  
Barbulescu, Roxana, HEC Paris  
Bar-Gill, Sagit, Massachusetts Institute of Technology  
Barillas, Francisco, Emory University  
Barinov, Alex, University of California, Riverside  
Bar-Isaac, Heski, University of Toronto  
Baron, Justus, Northwestern University  
Baron, Matthew, Cornell University  
Baron, Opher, University of Toronto  
Barrios, John, University of Chicago  
Barron, Daniel, Northwestern University  
Barron, Kai, Science Research Center Berlin gGmbH for Social Research  
Barroso, Pedro, University of New South Wales  
Bartling, Björn, University of Zurich  
Bartov, Eli, New York University  
Bartram, Sohnke, London Business School  
Baruch, Shmuel, University of Utah  
Basic, Zvonimir, Max Planck Institute for Research on Collective Goods  
Basker, Emek, United States Census Bureau  
Bassamboo, Achal, Northwestern University  
Bastani, Hamsa, University of Pennsylvania  
Bastin, Fabian, University of Montreal  
Batt, Robert, University of Wisconsin–Madison  
Battalio, Robert, University of Notre Dame  
Bauer, Michael, Federal Reserve Bank of San Francisco  
Baul, Tushi, University of Notre Dame  
Bauman, Konstantin, Temple University  
Bauner, Christoph, University of Massachusetts Amherst  
Bavafa, Hessam, University of Wisconsin  
Baydoun, May, NIA/NIH/IRP  
Bayraksan, Güzin, Ohio State University  
Beaman, Lori, Northwestern University  
Beck, Nathaniel, New York University  
Becker, Anke, Harvard University  
Becker-Peth, Michael, Erasmus University  
Beer, Ruth, Indiana University  
Begen, Mehmet, Western University  
Begenau, Juliane, Harvard University  
Behr, Patrick, Brazilian School of Public and Business Administration, Fundacao Getulio Vargas  
Belavina, Elena, Cornell University  
Belenzon, Sharon, Duke University  
Belleflamme, Paul, Catholic University of Louvain  
Bellemare, Charles, Laval University  
Belo, Frederico, University of Minnesota  
Belo, Rodrigo, Erasmus University  
Belot, Michele, University of Edinburgh  
Bena, Jan, University of British Columbia  
Ben-David, Itzhak, Ohio State University  
Bender, Mark, University of South Florida  
Bendersky, Corinne, University of California, Los Angeles  
Beneish, Daniel, Indiana University  
Bennett, Victor, Duke University  
Ben-Rephael, Azi, Indiana University  
Benson, Alan, University of Minnesota  
Benzoni, Luca, University of Minnesota  
Bereskin, Frederick, University of Missouri  
Berg, Tobias, Frankfurt School of Finance & Management  
Bergen, Mark, University of Minnesota  
Berger, Allen, University of South Carolina  
Berger, Sebastian, University of Bern  
Bergstresser, Daniel, Brandeis University  
Bergstrom, Ted, University of California, Santa Barbara  
Berlin, Mitchell, Federal Reserve Bank of Philadelphia  
Berling, Peter, Lund University  
Berman, Ron, University of Pennsylvania  
Bernard, Carole, University of Waterloo  
Bernile, Gennaro, University of Miami

## 2018 – All Reviewers

Bernstein, Asaf, University of Colorado Boulder  
Bernstein, Shai, Stanford University  
Berrospide, Jose, Federal Reserve Board  
Berry Jaeker, Jillian, Boston University  
Bertini, Marco, ESADE Business School  
Berzins, Janis, Stockholm School of Economics  
Beshears, John, Harvard Business School  
Best, Thomas, University of Wisconsin–  
Milwaukee  
Bhagat, Sanjai, University of Colorado  
Bhagwat, Vineet, George Washington University  
Bhandari, Tara, U.S. Securities and Exchange  
Commission  
Bhanot, Syon, Swarthmore College  
Bhardwaj, Pradeep, University of Central Florida  
Bhaskar, Umang, Tata Institute of Fundamental  
Research  
Bhaskaran, Sreekumar, Southern Methodist  
University  
Bhat, Gauri, Southern Methodist University  
Bhatia, Sudeep, University of Pennsylvania  
Bhattacharjee, Anol, University of South Florida  
Biais, Bruno, University of Toulouse  
Bichler, Martin, TU Muenchen  
Biggs, Max, Massachusetts Institute of  
Technology  
Bikard, Michael, London Business School  
Billett, Matthew, Indiana University  
Billio, Monica, Università Ca'Foscari  
Bimpikis, Kostas, Stanford University  
Bird, Andrew, Carnegie Mellon University  
Birru, Justin, Ohio State University  
Bizjak, John, Texas Christian University  
Bjarnadóttir, Margrét, University of Maryland,  
College Park  
Björk, Tomas, Stockholm School of Economics  
Black, Dirk, University of Nebraska–Lincoln  
Black, Lamont, DePaul University  
Blanchet, Jose, Stanford University  
Blanes i Vidal, Jordi, London School of  
Economics and Political Science  
Blankespoor, Elizabeth, Stanford University  
Blay, Allen, Florida State University  
Blit, Joel, University of Waterloo  
Blocher, Jesse, Vanderbilt University  
Blumrosen, Liad, Hebrew University of  
Jerusalem  
Bochkay, Khrystyna, University of Miami  
Bockenholt, Ulf, Northwestern University  
Bodnaruk, Andriy, University of Illinois  
Bodoh-Creed, Aaron, University of California,  
Berkeley  
Boehm, Johannes, Sciences Po  
Boguth, Oliver, Arizona State University  
Bolandifar, Ehsan, Chinese University of  
Hong Kong  
Boleslavsky, Raphael, University of Miami  
Bollinger, Bryan, Duke University  
Bommier, Antoine, ETH Zurich  
Bonaime, Alice, University of Arizona  
Bonaparte, Yosef, University of Colorado  
Denver  
Bonatti, Alessandro, Massachusetts Institute of  
Technology  
Bond, Samuel, Georgia Tech  
Bonetti, Pietro, IESE Business School  
Bongaerts, Dion, Erasmus University  
Bonsall, Samuel, Pennsylvania State University  
Boone, Audra, U.S. Securities and Exchange  
Commission  
Boonen, Tim, University of Amsterdam  
Boosey, Luke, Florida State University  
Borah, Abhishek, Institut Europeen  
d'Administration des Affaires  
borisov, alexander, University of Cincinnati  
Borri, Nicola, LUISS Guido Carli  
Bos, Marieke, Stockholm School of Economics  
Bothner, Matthew, European School of  
Management and Technology  
Boudreau, Kevin, Northeastern University  
Boughanmi, Khaled, Columbia University  
Boutillier, Justin, Massachusetts Institute of  
Technology  
Bouvard, Matthieu, McGill University  
Bouwens, Jan, University of Amsterdam  
Bouwman, Christa, Texas A&M University  
Bowman, Douglas, Emory University  
Boyabatli, Onur, Singapore Management  
University  
Boyaci, Tamer, McGill University  
Boyer, Brian, Brigham Young University  
Boyson, Nicole, Northeastern University  
Bracha, Anat, Federal Reserve Bank of Boston  
Bradford, William, University of Washington  
Bradley, Daniel, University of South Florida  
Brahm, Francisco, University of Cambridge

## 2018 – All Reviewers

Bramouille, Yann, GREQAM  
Branas-Garza, Pablo, Middlesex University  
Brandimarte, Laura, University of Arizona  
Brandon, Alec, University of Chicago  
Brands, Raina, London Business School  
Brandts, Jordi, Barcelona Graduate School of Economics  
Branstetter, Lee, Carnegie Mellon University  
Brashears, Matthew, University of South Carolina  
Bratten, Brian, University of Kentucky  
Brauning, Falk, Federal Reserve Bank of Boston  
Bray, Robert, Northwestern University  
Brenner, Lyle, University of Florida  
Breon-Drish, Bradyn, University of California, San Diego  
Bresman, Henrik, INSEAD  
Bretscher, Lorenzo, London School of Economics and Political Science  
Breugem, Matthijs, Collegio Carlo Alberto  
Brochet, Francois, Boston University  
Brockman, Paul, Lehigh University  
Brogaard, Jonathan, University of Washington  
Brookins, Philip, Max Planck Institute for Research on Collective Goods  
Brooks, Alison, University of Pennsylvania  
Brown, Alexander, Texas A&M University  
Brown, Anna, University of Connecticut  
Brown, David, Duke University  
Brown, James, Iowa State University  
Brown, Nerissa, University of Illinois at Urbana-Champaign  
Brownback, Andy, University of Arkansas, Fayetteville  
Bruggemann, Ulf, Humboldt University Berlin  
Bruhin, Adrian, University of Lausanne  
Bruno, Valentina, American University  
Brusa, Francesca, Temple University  
Bryan, Kevin, University of Toronto  
Bryzgalova, Svetlana, London Business School  
Budak, Ceren, University of Michigan  
Budescu, David, Fordham University  
Buell, Ryan, Harvard Business School  
Burbano, Vanessa, Columbia University  
Burch, Timothy, University of Miami  
Burer, Samuel, University of Iowa  
Burks, Jeffrey, University of Notre Dame  
Burks, Stephen, University of Minnesota, Morris  
Burtch, Gordon, University of Minnesota  
Busaba, Walid, Western University  
Buser, Thomas, University of Amsterdam  
Bushong, Ben, Michigan State University  
Buss, Adrian, INSEAD  
Bustamante, Maria, University of Maryland, College Park  
Butler, Alex, Rice University  
Byzalov, Dmitri, Temple University  
Cabrales, Antonio, University College London  
Cachon, Gerard, University of Pennsylvania  
Cadenillas, Abel, University of Alberta  
Cadman, Brian, University of Utah  
Caglayan, Caglar, Georgia Institute of Technology  
Cahliková, Jana, Max-Planck-Institut für Steuerrecht und öffentliche Finanzen  
Cai, Cexun (Jeff), National University of Singapore  
Cai, Jie, Drexel University  
Cai, Jing, University of Maryland, College Park  
Cai, Ning, Hong Kong University of Science and Technology  
Cai, Ye, Santa Clara University  
Cain, Daylian, Yale University  
Cakici, Nusret, Fordham University  
Caldieraro, Fabio, Escola Brasileira de Administração Pública e de Empresas  
Call, Andrew, Arizona State University  
Calluzzo, Paul, Queen's University  
Calmon, Andre, INSEAD  
Calvano, Emilio, University of Naples  
Campbell, Benjamin, Ohio State University  
Campbell, Elizabeth, University of Minnesota  
Campbell, John L., University of Georgia  
Campero, Santiago, HEC Paris  
Canayaz, Mehmet, Pennsylvania State University  
Canbolat, Pelin, Koç University  
Candogan, Ozan, University of Chicago  
Caner, Mehmet, Ohio State University  
Canina, Linda, Cornell University  
Cantor, David, Iowa State University  
Cao, Charles, Pennsylvania State University  
Cao, Sean, Georgia State University  
Cao, Xinyu, New York University  
Cao, Ying, Chinese University of Hong Kong  
Cao, Zike, Erasmus University

## 2018 – All Reviewers

Cappelen, Alexander, NHH Norwegian School of Economics  
Capponi, Agostino, Columbia University  
Carballo, Jeronimo, University of Colorado Boulder  
Carbo, Santiago, Colegio Universitario de Estudios Financieros  
Carbo-Valverde, Santiago, University of Wales  
Cárdenas Barrón, Leopoldo Eduardo, Monterrey Institute of Technology and Higher Education  
Care, Algo, Centrum Wiskunde en Informatica  
Carletti, Elena, Bocconi University  
Carlsson, John, University of Southern California  
Carnabuci, Gianluca, European School of Management and Technology  
Carnahan, Seth, Washington University in St. Louis  
Carpenter, Christopher, Vanderbilt University  
Carrion, Allen, University of Memphis  
Carvalho, Daniel, Indiana University Bloomington  
Casamatta, Catherine, Université Toulouse 1 Capitole  
Casas Arce, Pablo, Arizona State University  
Cascino, Stefano, London School of Economics and Political Science  
Caskey, Judson, University of California, Los Angeles  
Cassar, Alessandra, University of San Francisco  
Cassar, Gavin, INSEAD  
Cassar, Lea, University of Zurich  
Castellaneta, Francesco, Católica Lisbon  
Castillo, Marco, Texas A&M University  
Castro, Francisco, Columbia University  
Catalini, Christian, Massachusetts Institute of Technology  
Cavagnaro, Daniel, California State University, Fullerton  
Cazier, Richard, University of Texas at El Paso  
Ceccagnoli, Marco, Georgia Institute of Technology  
Cederburg, Scott, University of Arizona  
Cedergren, Matthew, University of Pennsylvania  
Celen, Bogachan, University of Melbourne  
Celhay, Pablo, Pontificia Universidad Católica de Chile  
Celikyurt, Ugur, Koç University  
Cen, Ling, Chinese University of Hong Kong  
Cenedese, Gino, Bank of England  
Centola, Damon, University of Pennsylvania  
Ceran, Yasin, Santa Clara University  
Cerrea-Vioglio, Simone, Bocconi University  
Cetorelli, Nicola, Federal Reserve Bank of New York  
Chabakauri, Georgy, London School of Economics and Political Science  
Chae, Heewon, Arizona State University  
Chae, Joon, Seoul National University  
Chaieb, Ines, University of Geneva  
Chakraborty, Indraneel, University of Miami  
Chan, Carri, Columbia University  
Chan, Jason, University of Minnesota  
Chan, Tian, Emory University  
Chan, Timothy, University of Toronto  
Chandrasekaran, Aravind, Ohio State University  
Chang, Edward, University of Pennsylvania  
Chang, Tom, University of Southern California  
Chang, Woo-Jin, HEC Paris  
Chang, Xin, Nanyang Technological University  
Chao, Matthew, Williams College  
Chaplinsky, Susan, University of Virginia  
Chapman, Kimball, Washington University in St. Louis  
Charoenwong, Ben, National University of Singapore  
Chatterjee, Chirantan, Indian Institute of Management, Bangalore  
Chatterji, Aaron, Duke University  
Chattopadhyay, Shinjinee, University of Illinois at Urbana Champaign  
Chaturvedi, Aadhaar, University of Namur  
Chava, Sudheer, Georgia Institute of Technology  
Chehrazi, Naveed, University of Texas at Austin  
Chemla, Gilles, Imperial College London  
Chemmanur, Thomas, Boston College  
Chen, Alice, University of Southern California  
Chen, Bo, Southern Methodist University  
Chen, Boxiao, University of Michigan  
Chen, Christopher, London Business School  
Chen, Clara, University of Illinois at Urbana-Champaign  
Chen, Guoli, INSEAD  
Chen, Hailiang, University of Hong Kong  
Chen, Hua, University of Georgia  
Chen, Huangyu, Boston University  
Chen, Hui, University of Colorado

## 2018 – All Reviewers

Chen, Jason, Tsinghua University  
Chen, Jiafeng, Harvard University  
Chen, Jianqing, University of Texas at Dallas  
Chen, Joseph, University of California, Davis  
Chen, Kevin, Hong Kong University of Science and Technology  
Chen, Li, Cornell University  
Chen, Ningyuan, Hong Kong University of Science and Technology  
Chen, Peter, Hong Kong University of Science and Technology  
Chen, Qi (George), London Business School  
Chen, Qi, Duke University  
Chen, Rachel, University of California, Davis  
Chen, Shi, University of Washington  
Chen, Tai-Yuan, Hong Kong University of Science and Technology  
Chen, Tao, Nanyang Technological University  
Chen, Wei, University of Arizona  
Chen, Wei, University of Kansas  
Chen, Xi, New York University  
Chen, Yanzhen, Hong Kong University of Science and Technology  
Chen, Ying-Ju, Hong Kong University of Science and Technology  
Chen, Yiwei, Singapore University of Technology and Design  
Chen, Yong, Texas A&M University  
Chen, Yuanyuan, University of Alabama  
Chen, Zhihong, Hong Kong University of Science and Technology  
Chen, Zhuo, Tsinghua University  
Chen, Zhuoqiong, Harbin Institute of Technology  
Cheng, Ing-Haw, Dartmouth College  
Cheng, Lin, University of Arizona  
Cheng, Mei, University of Arizona  
Cheng, Russell, University of Southampton  
Chernobai, Anna, Syracuse University  
Cheung, Wang Chi, National University of Singapore  
Cheynel, Edwige, University of California, San Diego  
Chiang, I-Hsuan Ethan, University of North Carolina at Charlotte  
Chick, Stephen, INSEAD  
Chidambaran, Nemmara, Fordham University  
Chinco, Alex, University of Illinois Urbana-Champaign  
Chiou, Lesley, Occidental College  
Chircop, Justin, Lancaster University  
Cho, Charles, York University  
Cho, Soo-Haeng, Carnegie Mellon University  
Cho, Thummim, London School of Economics and Political Science  
Cho, Young Jun, Singapore Management University  
Chod, Jiri, Boston College  
Choi, Ben, Nanyang Technological University  
Choi, Darwin, Chinese University of Hong Kong  
Choi, Jaewon, University of Illinois at Urbana-Champaign  
Choi, Jay, Michigan State University  
Choi, Jongwoon, University of Wisconsin-Madison  
Choi, JungHo, Stanford University  
Chondrakis, George, ESADE Business School  
Choshen-Hillel, Shoham, Hebrew University of Jerusalem  
Chou, Mabel, National University of Singapore  
Choudhary, Preeti, University of Arizona  
Choudhury, Prithwiraj, Harvard Business School  
Chown, Jillian, Northwestern University  
Christensen, Dane, University of Oregon  
Christophe, Stephen, George Mason University  
Chu, Johan, University of Chicago  
Chu, Junhong, National University of Singapore  
Chu, Leon, University of Southern California  
Chu, Yongqiang, University of South Carolina  
Chuan, Amanda, University of Pennsylvania  
Chuang, Yating, University of Wisconsin-Madison  
Chun, So Yeon, Georgetown University  
Chung, Doug, Harvard Business School  
Cianciaruso, Davide, HEC Paris  
Cicero, David, Auburn University  
Cil, Eren, University of Oregon  
Cillo, Alessandra, Bocconi University  
Ciocan, Florin, Institut Europeen d'Administration des Affaires  
Cipriani, Marco, Federal Reserve Bank of New York  
Cire, Andre, University of Toronto  
Clark, Jonathan, Pennsylvania State University

## 2018 – All Reviewers

Clark-Joseph, Adam, University of Illinois Urbana–Champaign  
Clement, Michael, University of Texas at Austin  
Clifford, Chris, University of Kentucky  
Cline, Brandon, Mississippi State University  
Clingingsmith, David, Case Western Reserve University  
Coad, Alexander, Pontificia Universidad Catolica del Peru  
Cobb, Adam, University of Pennsylvania  
Coffman, Katherine, Ohio State University  
Coffman, Lucas, Ohio State University  
Cohen, Asaf, University of Haifa  
Cohen, Daniel, University of Texas at Dallas  
Cohen, Lisa, McGill University  
Cohen, Maxime, New York University  
Cohen-Hillel, Tamar, Massachusetts Institute of Technology  
Colacito, Ric, University of North Carolina at Chapel Hill  
Colak, Ahmet, Clemson University  
Colla, Paolo, Bocconi University  
Colliard, Jean-Edouard, HEC Paris  
Collin-Dufresne, Pierre, École polytechnique fédérale de Lausanne  
Comez Dolgan, Nagihan, Istanbul Şehir University  
Cong, Will, University of Chicago  
Conklin, James, University of Georgia  
Conlon, Chris, New York University  
Conti, Annamaria, HEC Lausanne  
Conti, Raffaele, Católica Lisbon  
Conti, Rena, Boston University  
Cookson, J. Anthony, University of Colorado Boulder  
Cooper, Ryan, University of Maryland, College Park  
Cooper, William, University of Minnesota  
Corgnet, Brice, emlyon business school  
Corhay, Alexandre, University of Toronto  
Cornaggia, Jess, Georgetown University  
Cornaggia, Kimberly, Pennsylvania State University  
Cornelius, Philipp, Erasmus University  
Corrado, Carol, The Conference Board  
Cortes, Kristle, University of New South Wales  
Cosguner, Koray, Georgia State University  
Coulson, N., University of California, Davis  
Coutts, Alexander, Nova School of Business and Economics  
Coviello, Decio, HEC Montréal  
Crama, Pascale, Singapore Management University  
Crépon, Bruno, École Nationale de la Statistique et de l'Administration Économique  
Criscuolo, Chiara, Organisation for Economic Co-operation and Development  
Critcher, Clayton, University of California, Berkeley  
Cross, Dori, University of Minnesota  
Crotty, Kevin, Rice University  
Cseh, Ágnes, Hungarian Scientific Academy  
Cui, Ruomeng, Emory University  
Cui, Shiliang, Georgetown University  
Cui, Tony Haitao, University of Minnesota  
Cui, Yao, Cornell University  
Cunat, Vicente, London School of Economics and Political Science  
Cunha, Igor, University of Kentucky  
Cunningham, Colleen, London Business School  
Custodio, Claudia, Imperial College London  
Cusumano, Michael, Massachusetts Institute of Technology  
Cutler, Jennifer, Northwestern University  
Cvijanovic, Dragana, University of North Carolina at Chapel Hill  
Cvitanic, Jaksa, California Institute of Technology  
Cziraki, Peter, University of Toronto  
Da, Zhi, University of Notre Dame  
Dahl, Michael S., Aarhus University  
Dahlander, Linus, European School of Management and Technology  
Dai, Hengchen, University of California, Los Angeles  
Dai, Min, National University of Singapore  
Dai, Tinglong, Johns Hopkins University  
Dai, Weijia, Lehigh University  
Dalal, Dev, University at Albany–SUNY  
Dalton, Patricio, Tilburg University  
Dam, Robert, University of Colorado Boulder  
Dana, James, Northeastern University  
Dana, Jason, Yale University  
Danaher, Brett, Chapman University  
Daniels, Kaitlin, Washington University in St. Louis

## 2018 – All Reviewers

Danis, Andras, Georgia Tech  
Dao, Duy, University of Calgary  
Dargnies, Marie-Pierre, Paris-Dauphine University  
Darrough, Masako, Baruch College  
Dasgupta, Amil, London School of Economics and Political Science  
Dash, Sanjeeb, IBM Thomas J Watson Research Center  
Dasu, Sriram, University of Southern California  
Davidson, Robert, Virginia Polytechnic Institute and State University  
Davis, Andrew, Cornell University  
Davis, Angela, University of Oregon  
Davis, Jesse, University of North Carolina  
Dawande, Milind, University of Texas at Dallas  
Dayarian, Iman, Georgia Institute of Technology  
De Angelis, David, Rice University  
de Bettignies, Jean-Etienne, Queen's University  
de Corniere, Alexandre, Toulouse School of Economics  
de Fontenay, Catherine, University of Melbourne  
De Franco, Gus, Tulane University  
De George, Emmanuel, London Business School  
De Giorgi, Enrico, University of St. Gallen  
De Giovanni, Domenico, University of Calabria  
de Haan, Thomas, Norges Handelshoyskole  
de Jong, Martijn, Erasmus University Rotterdam  
de Kok, Ton, Eindhoven University of Technology  
de Montjoye, Yves-Alexandre, Imperial College London  
de Motta, Adolfo, McGill University  
de Quidt, Jon, Stockholm University  
De Reyck, Bert, University College London  
Dean, Mark, Columbia University  
DeAngelis, Matthew, Georgia State University  
DeCelles, Katherine, University of Toronto  
Deck, Cary, University of Arkansas  
DeFusco, Anthony, Northwestern University  
Degryse, Hans, Tilburg University  
Deily, Mary E., Lehigh University  
Dekker, Henri, Vrije Universiteit  
Delecourt, Solene, Stanford University  
Delfgaauw, Josse, Erasmus University Rotterdam  
Delgado, M. Kit, University of Pennsylvania  
Delgado, Mercedes, Temple University  
Della Corte, Pasquale, Imperial College London  
Dell'Ariccia, Giovanni, IMF  
Demerjian, Peter, University of Washington  
Demeulemeester, Erik, Katholieke Universiteit Leuven  
DeMiguel, Victor, London Business School  
Demiroglu, Cem, Koç University  
den Boer, Arnoud, University of Amsterdam  
Deng, Ming Cherng, Baruch College  
Deng, Xiaoyan, Ohio State University  
Deng, Yiting, University College London  
Denis, Diane, University of Pittsburgh  
Denrell, Jerker, Oxford University  
Derdenger, Timothy, Carnegie Mellon University  
Derfler-Rozin, Rellie, University of Maryland, College Park  
Derrien, François, HEC Paris  
Dertwinkel-Kalt, Markus, University of Cologne  
Desai, Hemang, Southern Methodist University  
DeSantis, Mark, Chapman University  
Desir, Antoine, Columbia University  
Detering, Nils, University of California, Santa Barbara  
Devalkar, Sripad, Indian School of Business  
DeValve, Levi, Duke University  
DeVaro, Jed, California State University, East Bay  
Dew, Ryan, University of Pennsylvania  
Dey, Aiyasha, University of Minnesota  
Dhillon, Paramveer, Massachusetts Institute of Technology  
Di Maggio, Marco, Harvard Business School  
Dick-Nielsen, Jens, Copenhagen Business School  
Dietvorst, Berkeley, University of Chicago  
Dillon, Robin, Georgetown University  
Dimitrov, Valentin, Rutgers University  
Dimmock, Stephen, Nanyang Technological University  
Dimopoulos, Theodosios, University of Lausanne  
Dinc, Serdar, Rutgers University  
Ding, Waverly, University of Maryland, College Park  
Ding, Yichuan, University of British Columbia  
Distelhorst, Gregory, University of Toronto  
Dittmar, Amy, University of Michigan  
Dixon, Peter, University of Tennessee, Knoxville

## 2018 – All Reviewers

Dlugosz, Jennifer, Washington University in St. Louis  
Dobrev, Stanislav, University of Wisconsin–Milwaukee  
Doering, Laura, University of Toronto  
Dogan, Mustafa, Carnegie Mellon University  
Dokka, Trivikram, Lancaster University  
Dong, Jing, Columbia University  
Dong, Xiaojing, Santa Clara University  
Dong, Yan, University of South Carolina  
Donkers, Bas, Erasmus University Rotterdam  
Donohue, Karen, University of Minnesota  
Dorion, Christian, HEC Montréal  
Dorn, Daniel, Drexel University  
Doroudi, Sherwin, Carnegie Mellon University  
Doshi, Anil, University College London  
Dou, Winston, University of Pennsylvania  
Dou, Yifan, Fudan University  
Dou, Yiwei, New York University  
Dougal, Casey, Drexel University  
Doukas, John, Old Dominion University  
Doval, Laura, California Institute of Technology  
Dover, Yaniv, Hebrew University of Jerusalem  
Dow, James, London Business School  
Dowell, Glen, Cornell University  
Draca, Mirko, University of Warwick  
Drake, David, University of Colorado Boulder  
Drake, Michael, Brigham Young University  
Drakopoulos, Kimon, University of Southern California  
Dreber, Anna, Stockholm School of Economics  
Drev, Matej, Georgia Institute of Technology  
Du, Kui, University of Massachusetts Boston  
Du, Qianqian, Hong Kong Polytechnic University  
Du, Rex, University of Houston  
Duan, Jason, University of Texas at Austin  
Duchin, Ran, University of Washington  
Duenyas, Izak, University of Michigan  
Dufwenberg, Martin, University of Arizona  
Dunn, Jack, Massachusetts Institute of Technology  
Dur, Robert, Erasmus University Rotterdam  
Durnev, Artem, University of Iowa  
Dutcher, Glenn, Ohio University  
Dutta, Kaushik, University of South Florida  
Dutta, Sunil, University of California, Berkeley  
Dye, Ronald, Northwestern University  
Dyreg, Scott, Duke University  
Dzyabura, Daria, New York University  
Ebbes, Peter, HEC Paris  
Ebert, Sebastian, Frankfurt School of Finance & Management  
Eckles, Dean, Facebook  
Economou, Antonis, University of Athens  
Edelman, Ben, Harvard Business School  
Edelman, Benjamin, Harvard Business School  
Ederer, Florian, Yale University  
Edwards, Alexander, University of Toronto  
Eesley, Charles, Stanford University  
Efing, Matthias, HEC Paris  
Egan, Mark, Harvard Business School  
Ege, Matthew, Texas A&M University  
Eilert, Meike, University of Kentucky  
Eisenbach, Thomas, Federal Reserve Bank of New York  
Ekmekci, Mehmet, Boston College  
Ekström, Mathias, Norwegian School of Economics  
El Ghouli, Sadok, University of Alberta  
Elbanna, Amany, University of London  
Elfenbein, Daniel, Washington University in St. Louis  
Eliashberg, Jehoshua, University of Pennsylvania  
Eling, Katrin, Eindhoven University of Technology  
Ellis, Jesse, North Carolina State University  
Ellman, Matthew, Institut d'Analisi Economica  
Ellul, Andrew, Indiana University  
Elmachtoub, Adam, Columbia University  
Emadi, Seyed M., University of North Carolina at Chapel Hill  
Embrey, Matthew, Maastricht University  
Engl, Florian, University of Cologne  
Englmaier, Florian, University Würzburg  
Erat, Sanjiv, University of California, San Diego  
Erev, Ido, Technion – Israel Institute of Technology  
Ericson, Keith, Boston University  
Ericsson, Jan, McGill University  
Erikson, Emily, Yale University  
Eriksson, Tor, Aarhus University  
Erkal, Nisvan, University of Melbourne  
Erkens, David, Georgetown University  
Ernstberger, Jürgen, Technical University of Munich  
Erol, Selman, Carnegie Mellon University

## 2018 – All Reviewers

Ertac, Seda, Koç University  
Ertekin, Necati, Santa Clara University  
Ertimur, Yonca, University of Colorado Boulder  
Eskreis-Winkler, Lauren, University of Pennsylvania  
Esponda, Ignacio, University of California, Santa Barbara  
Esteves-Sorenson, Constanca, Yale University  
Evans, John, University of Pittsburgh  
Evans, Richard, University of Virginia  
Even-Tov, Omri, University of California, Berkeley  
Ewens, Michael, California Institute of Technology  
Exley, Christine, Harvard Business School  
Fabbri, Daniela, University of London  
Fagerholt, Kjetil, Norwegian University of Science and Technology  
Fahlenbrach, Rudiger, École polytechnique fédérale de Lausanne  
Fairlie, Robert, University of California, Santa Cruz  
Fallucchi, Francesco, Luxembourg Institute of Socio-Economic Research  
Fan, Ming, University of Washington  
Fan, Ying, University of Michigan  
Fan, Yueyue, University of California, Davis  
Fang, Lily, INSEAD  
Fang, Vivian, University of Minnesota  
Fang, Xiao, University of Delaware  
Fang, Xin, Singapore Management University  
Fang, Yulin, City University of Hong Kong  
Farahat, Amr, Massachusetts Institute of Technology  
Faro, David, London Business School  
Faro, José Heleno, Federal University of Minas Gerais  
Farre-Mensa, Joan, Harvard University  
Farronato, Chiara, Harvard Business School  
Farrow, Malcolm, Newcastle University  
Fatas, Enrique, Loughborough University  
Favero, Carlo, Bocconi University  
Fay, Scott, Syracuse University  
Fazli, Amir, University of Washington  
Fee, C Edward, Tulane University  
Feehan, Dennis, University of California, Berkeley  
Fehder, Daniel, Massachusetts Institute of Technology  
Fehr-Duda, Helga, University of Zurich  
Fehrer, Sebastian, University of Konstanz  
Feinberg, Fred, University of Michigan  
Feinstein, Zachary, Washington University in St. Louis  
Feldhutter, Peter, London Business School  
Feldman, David, University of New South Wales  
Feldman, Jacob, Washington University in St. Louis  
Feldman, Pnina, Boston University  
Felin, Teppo, University of Oxford  
Feltovich, Nick, Monash University  
Feng, Felix, University of Notre Dame  
Feng, Juan, City University of Hong Kong  
Feng, Mei, University of Pittsburgh  
Ferguson, John-Paul, McGill University  
Ferguson, Mark, University of South Carolina  
Fernandez, Manuel, University of Essex  
Fernando, Duarte, Federal Reserve Bank of New York  
Fernbach, Philip, University of Colorado  
Ferreira, Kris, Harvard Business School  
Ferreira, Pedro, Carnegie Mellon University  
Ferri, Fabrizio, University of Miami  
Ferriani, Simone, University of Bologna  
Fich, Eliezer, Drexel University  
Figge, Patrick, University of Passau  
Files, Rebecca, University of Texas at Dallas  
Filippas, Apostolos, Stevens Institute of Technology  
Filippin, Antonio, University of Milan  
Filistrucchi, Lapo, University of Florence  
Filiz-Ozbay, Emil, University of Maryland, College Park  
Fink, Lior, Ben-Gurion University of the Negev  
Flammer, Caroline, Boston University  
Fleming, Lee, University of California, Berkeley  
Fletcher, Jonathan, University of Strathclyde  
Flores-Szwagrzak, Karol, Copenhagen Business School  
Florou, Annita, King's College London  
Floyd, Eric, University of California, San Diego  
Foley, Sean, University of Sydney  
Fong, Nathan, Rutgers University  
Fons-Rosen, Christian, Pompeu Fabra University  
Fontaine, Jean-Sébastien, Bank of Canada

## 2018 – All Reviewers

Forster, Martin, University of York  
Fortney, Steven, Yale University  
Fos, Vyacheslav, Boston College  
Fracassi, Cesare, University of Texas at Austin  
Fradkin, Andrey, Boston University  
Frake, Justin, University of Maryland, College Park  
Frakes, Michael, Duke University  
Frame, Scott, Federal Reserve Bank of Atlanta  
Franco, Francesca, London Business School  
Franzoni, Chiara, Politecnico di Milano  
Franzoni, Francesco, Università della Svizzera italiana  
Freedman, Seth, Indiana University  
Freeman, Michael, INSEAD  
Frei, Christoph, University of Alberta  
Frenkel, Sivan, Tel Aviv University  
Fresard, Laurent, University of Maryland, College Park  
Freund, Daniel, Cornell University  
Freund, Robert, Massachusetts Institute of Technology  
Friedman, Henry, University of California, Los Angeles  
Frydman, Cary, University of Southern California  
Fu, Fangjian, Singapore Management University  
Fu, Qiang, National University of Singapore  
Fuller, Kathleen, University of Mississippi  
Furman, Jeff, Boston University  
Fusari, Nicola, Johns Hopkins University  
Gaba, Anil, INSEAD  
Gaertig, Celia, University of Pennsylvania  
Gal, David, Northwestern University  
Gala, Vito, University of Pennsylvania  
Galasso, Alberto, University of Toronto  
Galbreth, Michael, University of South Carolina  
Gallani, Susanna, Harvard Business School  
Gallemore, John, University of Chicago  
Gallino, Santiago, University of Pennsylvania  
Gallmeyer, Michael, McIntire School of Commerce  
Gallus, Jana, University of California, Los Angeles  
Gal-Or, Esther, University of Pittsburgh  
Gan, Jie, Cheung Kong Graduate School of Business  
Ganduri, Rohan, Emory University  
Ganguli, Ina, University of Massachusetts Amherst  
Gangwar, Manish, Indian School of Business  
Ganju, Kartik, McGill University  
Gannamaneni, Avinash, Massachusetts Institute of Technology  
Ganong, Peter, University of Chicago Medical Center  
Gantchev, Nickolay, Southern Methodist University  
Ganuza, Juan-Jose, Pompeu Fabra University  
Gao, Fei, Indiana University Bloomington  
Gao, Janet, Indiana University  
Gao, Long, University of California, Riverside  
Gao, Pengjie, University of Notre Dame  
Gao, Pingyang, University of Chicago  
Gao, Rui, Georgia Institute of Technology  
Gao, Sarah, Lee Kong Chian School of Business  
Gao, Xiangyu, Chinese University of Hong Kong  
Gao, Xiaohui, University of Maryland, College Park  
Gao, Yu, University of St. Thomas  
Garcia, Diego, University of North Carolina at Chapel Hill  
Garcia, René, University of Montreal  
Garcia, Stephen, University of Michigan  
García-Gallego, Aurora, Jaume I University  
Gardete, Pedro, Stanford University  
Gardner, Kristen, Amherst College  
Garfinkel, Jon, University of Iowa  
Garg, Rajiv, University of Texas at Austin  
Garg, Sam, Hong Kong University of Science and Technology  
Garrett, Daniel, Northwestern University  
Gartenberg, Claudine, New York University  
Gatev, Evan, Simon Fraser University  
Gaudin, Germain, European Commission  
Ge, Li, Monash University  
Ge, Weili, University of Washington  
Geelen, Thomas, École polytechnique fédérale de Lausanne  
Genakos, Christos, University of Cambridge  
Geng, Xianjun, University of Texas at Dallas  
George, Thomas, University of Houston  
Georghiou, Angelos, McGill University  
Georgiadis, George, Boston University  
Gerakos, Joseph, Dartmouth College  
Germano, Guido, University College London

## 2018 – All Reviewers

Gershkov, Alex, Hebrew University of Jerusalem  
Gershon, Rachel, Washington University in St. Louis  
Gesche, Tobias, University College London  
Geylani, Tansev, University of Pittsburgh  
Ghamami, Samim, University of California, Berkeley  
Ghasemkhani, Hossein, Purdue University  
Ghate, Archis, University of Washington  
Ghent, Andra, University of Wisconsin–Madison  
Ghosh, Aloke, Baruch College  
Ghosh, Soumyadip, IBM Research  
Giacoletti, Marco, University of Southern California  
Giambona, Erasmo, Syracuse University  
Giannetti, Mariassunta, Stockholm School of Economics  
Gielnik, Michael, Leuphana Universität Lüneburg Fakultät Wirtschaft  
Giesecke, Kay, Stanford University  
Gil-Bazo, Javier, Pompeu Fabra University  
Gilbert, Thomas, University of Washington  
Gilchrist, Duncan, Harvard University  
Gilje, Erik, University of Pennsylvania  
Gill, David, Purdue University  
Gillen, Ben, California Institute of Technology  
Gillette, Jacquelyn, Massachusetts Institute of Technology  
Ginglinger, Edith, Paris-Dauphine University  
Gino, Francesca, Harvard Business School  
Giroud, Xavier, Columbia University  
Gittell, Jody Hoffer, Brandeis University  
Giuntella, Osea, University of Pittsburgh  
Glaeser, Chloe, University of North Carolina at Chapel Hill  
Glaser, Markus, Ludwig Maximilian University of Munich  
Glasserman, Paul, Columbia University  
Glode, Vincent, University of Pennsylvania  
Glover, Brent, Carnegie Mellon University  
Gneezy, Ayelet, University of California, San Diego  
Gobet, Emmanuel, École polytechnique  
Godinho de Matos, Miguel, Católica Lisbon  
Goel, Sharad, Stanford University  
Goerg, Sebastian, Technical University of Munich  
Goetzmann, William, Yale University  
Goex, Robert, University of Zurich  
Gofman, Michael, University of Wisconsin–Madison  
Goh, Joel, National University of Singapore  
Goic, Marcel, University of Chile  
Gokpinar, Bilal, University College London  
Goldberg, David, Cornell University  
Goldman, Eitan, Indiana University  
Goldman, Jim, University of Toronto  
Goldsmith-Pinkham, Paul, Yale School of Management  
Goldstein, Daniel, Microsoft Research  
Goldstein, Michael, Babson College  
Goldstein, Robert, University of Minnesota  
Golez, Benjamin, University of Notre Dame  
Golman, Russell, Carnegie Mellon University  
Golrezaei, Negin, Massachusetts Institute of Technology  
Golubov, Andrey, University of Toronto  
Gomes, Francisco, London Business School  
Gomes, Renato, Université Toulouse 1 Capitole  
Gómez, Miguel, Cornell University  
Gondhi, Naveen, INSEAD  
Gong, Guojin, Pennsylvania State University  
Gong, Jie, National University of Singapore  
Gong, Jing, Temple University  
Gong, Xiting, Chinese University of Hong Kong  
Goodhue, Dale Louis, University of Georgia  
Goodman, Theodore, Purdue University  
Goodwin, Geoffrey, University of Pennsylvania  
Gopalakrishnan, Arun, Washington University in St. Louis  
Gopalakrishnan, Ragavendran, Cornell University  
Gopalan, Radhakrishnan, Washington University in St. Louis  
Gopinath, Shyam, Indiana University Bloomington  
Gorback, Caitlin, University of Pennsylvania  
Gorbenko, Alexander, University of Southern California  
Gordon, Brett, Northwestern University  
Gormsen, Niels, University of Chicago  
Gornall, Will, University of British Columbia  
Gotoh, Jun-ya, Chuo University  
Gottlieb, Daniel, Washington University in St. Louis

## 2018 – All Reviewers

Gounaris, Chrysanthos, Carnegie Mellon University  
Gourier, Elise, Princeton University  
Gow, Ian, Harvard University  
Goyal, Amit, University of Lausanne  
Goyal, Manu, University of Utah  
Goyal, Vidhan, Hong Kong University of Science and Technology  
Goyal, Vineet, Columbia University  
Goyenko, Ruslan, McGill University  
Grabner, Isabella, Maastricht University  
Graddy, Kathryn, Brandeis University  
Graniero, Alessandro, Stockholm School of Economics  
Gray, John, Ohio State University  
Gray, Steven, University of Texas at Austin  
Green, Brett, University of California, Berkeley  
Green, Clifton, Emory University  
Green, Ellen, Arizona State University  
Green, Etan, University of Pennsylvania  
Green, Jeremiah, Pennsylvania State University  
Greenberg, Adam, Bocconi University  
Greenberg, Jason, New York University  
Greenwood, Brad, University of Minnesota  
Grennan, Jillian, Duke University  
Gretschko, Vitali, University of Cologne  
Grewal, Dhruv, Babson College  
Grewal, Jody, Harvard Business School  
Griffin, Dale, University of British Columbia  
Grigas, Paul, University of California, Berkeley  
Grinstein, Yaniv, Interdisciplinary Center Herzliya  
Griskevicius, Vladas, University of Minnesota  
Groenevelt, Harry, University of Rochester  
Gross, Daniel, Harvard Business School  
Grossman, Philip, Monash University  
Grossman, Zachary, Florida State University  
Grullon, Gustavo, Rice University  
Grundl, Serafin, Federal Reserve Board  
Gryglewicz, Sebastian, Erasmus University Rotterdam  
Gu, Olivia Lifeng, University of Hong Kong  
Gu, Zheyin (Jane), University of Connecticut  
Guajardo, Jose, University of California, Berkeley  
Gubler, Timothy, University of California, Riverside  
Gue, Kevin, University of Louisville  
Guedhami, Omrane, University of South Carolina  
Guerre, Emmanuel, Queen Mary University of London  
Guest, Nick, Cornell University  
Gui, Luyi, University of California, Davis  
Gulen, Huseyin, Purdue University  
Gumus, Mehmet, McGill University  
Guo, Hong, University of Notre Dame  
Guo, Hui, University of Cincinnati  
Guo, Jun, Rutgers University  
Guo, Liang, Chinese University of Hong Kong  
Guo, Pengfei, Hong Kong Polytechnic University  
Guo, Zhiling, Singapore Management University  
Gupta, Arpit, New York University  
Gupta, Diwakar, University of Texas at Austin  
Gupta, Nandini, Indiana University  
Gupta, Vishal, University of Southern California  
Gupte, Akshay, Clemson University  
Gur, Yonatan, Stanford University  
Gurnani, Haresh, Wake Forest University  
Gürtler, Oliver, University of Cologne  
Gurun, Umit, University of Texas at Dallas  
Gustafson, Matthew, Pennsylvania State University  
Guthrie, Graeme, Victoria University of Wellington  
Guzman, Jorge, Massachusetts Institute of Technology  
Haas, Martine, University of Pennsylvania  
Hadlock, Charles, Michigan State University  
Hafalir, Isa Emin, University of Technology Sydney  
Hagiu, Andrei, Boston University  
Hainaut, Donatien, Catholic University of Louvain  
Haki, Kazem, University of St. Gallen  
Halbheer, Daniel, HEC Paris  
Halgin, Dan, University of Kentucky  
Halko, Marja-Liisa, Aalto University  
Halling, Michael, Stockholm School of Economics  
Halman, Nir, Hebrew University of Jerusalem  
Ham, Sung, George Washington University  
Hameed, Allaudeen, National University of Singapore  
Hamm, Sophia, Ohio State University  
Hamman, John, Florida State University

## 2018 – All Reviewers

Han, Jungsuk, Stockholm School of Economics  
Han, Lu, University of Toronto  
Han, Sang Pil, Arizona State University  
Hanasusanto, Grani Adiwena, University of Texas at Austin  
Handley, Kyle, University of Michigan  
Handley, Sean, University of South Carolina  
Hanke, Michael, University of Liechtenstein  
Hankins, Kristine, University of Kentucky  
Hanley, Kathleen, Lehigh University  
Hansen, Benjamin, University of Oregon  
Harbaugh, Rick, Indiana University  
Harbring, Christine, RWTH Aachen University  
Hardie, Bruce, London Business School  
Hardisty, David, University of British Columbia  
Harford, Jarrad, University of Washington  
Harrison, Glenn, Georgia State University  
Harsha, Pavithra, IBM Thomas J Watson Research Center  
Hartman, Bruce, California Maritime Academy  
Hartman-Glaser, Barney, University of California, Los Angeles  
Hartzmark, Samuel, University of Southern California  
Haruvy, Ernan, University of Texas at Dallas  
Hasan, Iftekhar, Fordham University  
Hasan, Sharique, Duke University  
Hashim, Matthew, University of Arizona  
Haslag, Peter, Vanderbilt University  
Hassin, Refael, Tel Aviv University  
Hatfield, John, University of Texas at Austin  
Hauser, Oliver, University of Exeter  
Haushofer, Johannes, Princeton University  
Hausman, Naomi, Hebrew University of Jerusalem  
Haviv, Avery, University of Toronto  
Havrylchyk, Olena, Universite Paris 1 Pantheon-Sorbonne  
Hawk, Ashton, Ohio State University  
Hawn, Olga, University of North Carolina at Chapel Hill  
Hazarika, Sonali, Baruch College  
He, Chuan, University of Colorado Boulder  
He, Jie, University of Georgia  
He, Long, National University of Singapore  
He, Qie, University of Minnesota  
He, Shuangchi, National University of Singapore  
Heath, Davidson, University of Utah  
Heese, H. Sebastian, North Carolina State University  
Heese, Jonas, Harvard Business School  
Hegde, Deepak, New York University  
Heidhues, Paul, Heinrich Heine Universität Düsseldorf  
Heinle, Mirko, University of Pennsylvania  
Heinz, Matthias, Goethe University  
Hellmann, Thomas, University of Oxford  
Helm, Jonathan, Indiana University Bloomington  
Helwege, Jean, University of California, Riverside  
Henkel, Joachim, Technical University of Munich  
Henry, Emeric, Sciences Po  
Hepfer, Bradford, Texas A&M University  
Hermosilla, Manuel, Johns Hopkins University  
Hernan Gonzalez, Roberto, University Bourgogne Franche Comté  
Hernandez, Exequiel, University of Pennsylvania  
Herskovic, Bernard, University of California, Los Angeles  
Hertwig, Ralph, Max Planck Institute for Human Development  
Hertzfel, Michael, Arizona State University  
Hervas-Drane, Andres, University College London  
Herz, Holger, University of Friborg  
Hilary, Gilles, Georgetown University  
Hillert, Alexander, Goethe University  
Hirsh, Elizabeth, University of British Columbia  
Ho, Chin Pang, Imperial College Business School  
Ho, Yi-Jen (Ian), Pennsylvania State University  
Hoban, Paul, University of Wisconsin–Madison  
Hobbs, Benjamin, Johns Hopkins University  
Hoberg, Gerard, University of Southern California  
Hofert, Marius, University of Waterloo  
Hoffman, Mitchell, University of Toronto  
Hofman, Jake, Microsoft Research  
Hofmann, Christian, Ludwig Maximilian University of Munich  
Hoisl, Karin, University of Mannheim  
Hoitash, Udi, Northeastern University  
Holden, Craig, Indiana University  
Hollenbeck, Brett, University of California, Los Angeles  
Holm, Hakan, Lund University  
Holmen, Martin, University of Gothenburg

## 2018 – All Reviewers

Holzhaecker, Martin, Michigan State University  
Holzman, Eric, Ohio State University  
Hong, Bryan, Western University  
Hong, Yili, Arizona State University  
Honka, Elisabeth, University of California, Los Angeles  
Hoopes, Jeffrey, University of North Carolina at Chapel Hill  
Hora, Manpreet, Georgia Institute of Technology  
Horstmeyer, Derek, George Mason University  
Horton, John, New York University  
Hossain, Tanjim, University of Toronto  
Hotchkiss, Edith, Boston College  
Hou, Kewei, Ohio State University  
Hougaard, Jens, University of Copenhagen  
Houser, Daniel, George Mason University  
Howell, Sabrina, New York University  
Hristakeva, Sylvia, University of California, Los Angeles  
Hsee, Christopher, University of Chicago  
Hsu, Joanne, Federal Reserve Board  
Hsu, Ming, University of California, Berkeley  
Hsu, Po-Hsuan, University of Hong Kong  
Hu, Bin, University of Texas at Dallas  
Hu, Grace, University of Hong Kong  
Hu, Guangzhou, National University of Singapore  
Hu, Jianfeng, Singapore Management University  
Hu, Ming, University of Toronto  
Hu, Ruimeng, University of California, Santa Barbara  
Hu, Yuheng, University of Illinois at Chicago  
Hu, Zhenyu, National University of Singapore  
Huang, Allen, Hong Kong University of Science and Technology  
Huang, Chong, University of California, Irvine  
Huang, Guofang, Purdue University  
Huang, Jiekun, University of Illinois at Urbana-Champaign  
Huang, Ke-Wei, National University of Singapore  
Huang, Ni, Arizona State University  
Huang, Peng, University of Maryland, College Park  
Huang, Shan, National University of Singapore  
Huang, Shan, University of Washington  
Huang, Shiyang, Hong Kong University  
Huang, Sterling, Singapore Management University  
Huang, Tingliang, Boston College  
Huang, Wei, Wuhan University  
Huang, Xing, Washington University in St. Louis  
Huang, Yan, Carnegie Mellon University  
Huang, Yufeng, University of Rochester  
Huang, Zeqiong, Yale University  
Huber, Juergen, University of Innsbruck  
Huck, Steffen, University College London  
Huddart, Steven, Pennsylvania State University  
Huesmann, Katharina, University of Cologne  
Huet-Vaughn, Emiliano, Middlebury College  
Huffman, David, University of Pittsburgh  
Hughes-Oliver, Jacqueline, North Carolina State University  
Hugon, Artur, Arizona State University  
Hui, Sam, New York University  
Hui, Xiang, Washington University in St. Louis  
Hung, Mingyi, Hong Kong University of Science and Technology  
Hurlin, Christophe, University of Orleans  
Huseman, Olivia, Chapman University  
Huszar, Zsuzsa, National University of Singapore  
Hutchison-Krupat, Jeremy, University of Virginia  
Hutton, Amy, Boston College  
Hwang, Hyoseok (David), Rutgers University  
Hydari, Muhammad (Zia), University of Pittsburgh  
Hyndman, Kyle, University of Texas at Dallas  
Hyytinen, Ari, Hanken School of Economics  
Iancu, Dan, Stanford University  
Ibanez, Maria, Harvard Business School  
Ibert, Markus, Stockholm School of Economics  
Ibrahim, Rouba, University College London  
Ifcher, John, Santa Clara University  
Igami, Mitrura, Yale University  
Igan, Deniz, IMF  
Illeditsch, Philipp, University of Pennsylvania  
Imas, Alex, Carnegie Mellon University  
Innocenti, Alessandro, University of Siena  
Intintoli, Vince, Clemson University  
Ipeirotis, Panos, New York University  
Ippolito, Filippo, Pompeu Fabra University  
Irani, Rustom, University of Illinois  
Iravani, Foad, University of Washington  
Iriberry, Nagore, University of the Basque Country

## 2018 – All Reviewers

Irlenbusch, Bernd, University of Cologne  
Irvine, Paul, Texas Christian University  
Ishihara, Masakazu, New York University  
Iskhakov, Fedor, Australian National University  
Isohätälä, Jukka, National University of Singapore  
Israeli, Ayelet, Harvard Business School  
Israelsen, Ryan, Michigan State University  
Ivkovich, Zoran, Michigan State University  
Iyengar, Raghuram, University of Pennsylvania  
Iyer, Krishnamurthy, Cornell University  
Izhakian, Yehuda, New York University  
Jackwerth, Jens, University of Konstanz  
Jacobs, Heiko, University of Duisburg-Essen  
Jacobs, Kris, McGill University  
Jacobsen, Stacey, Southern Methodist University  
Jagabathula, Srikanth, New York University  
Jagannathan, Ravi, Northwestern University  
Jaillet, Patrick, Massachusetts Institute of Technology  
Jaimungal, Sebastian, University of Toronto  
Jain, Archana, Rochester Institute of Technology  
Jain, Nitish, London Business School  
Jain, Tarun, Indian School of Business  
Jamal, Karim, University of Alberta  
Jame, Russell, University of Kentucky  
Janakiraman, Ganesh, University of Texas at Dallas  
Janakiraman, Ramkumar, University of South Carolina  
Jananefat, Shadi, University of Pittsburgh  
Jank, Stephan, Deutsche Bundesbank  
Jappelli, Tullio, University of Naples Federico II  
Jasin, Stefanus, University of Michigan  
Javanmard, Adel, University of Southern California  
Jayaraman, Sudarshan, University of Rochester  
Jennings, Jared, Washington University in St. Louis  
Jensen, Tyler, Iowa State University  
Jeppesen, Lars, Copenhagen Business School  
Jerath, Kinshuk, Columbia University  
Ji, Yonghua, University of Alberta  
Jia, Nan, University of Southern California  
Jiang, Baojun, Washington University in St. Louis  
Jiang, Danling, Florida State University  
Jiang, Hao, Michigan State University  
Jiang, John, Michigan State University  
Jiang, Juncai, Virginia Polytechnic Institute and State University  
Jiang, Ruiwei, University of Michigan  
Jiang, Wenxi, Chinese University of Hong Kong  
Jiang, Xu, Dule University  
Jin, Fujie, Indiana University Bloomington  
Jin, Ginger, University of Maryland, College Park  
Jin, Hanqing, University of Oxford  
Jin, Lawrence, California Institute of Technology  
Jindal, Pranav, University of North Carolina  
Jing, Bing, Cheung Kong Graduate School of Business  
Jochem, Torsten, University of Amsterdam  
Joglekar, Nitin, Boston University  
Johnen, Johannes, Catholic University of Louvain  
Johnson, Eric, Columbia University  
Johnson, Garrett, University of Rochester  
Johnson, Matthew, Duke University  
Johnson, Steven, University of Virginia  
Johnson, Timothy, University of Illinois at Urbana–Champaign  
Johnson, Travis, University of Texas at Austin  
Johnson, William, Suffolk University  
Johnston, Christopher, Duke University  
Jonasson, Jonas, Massachusetts Institute of Technology  
Jondeau, Eric, University of Lausanne  
Jones, Damon, University of Chicago  
Jones, Jason, Stony Brook University  
Joo, Mingyu, Ohio State University  
Jose, Victor Richmond, Georgetown University  
Joseph, Kissan, University of Kansas  
Josephson, Jens, Stockholm University  
Joshi, Satish, Michigan State University  
Joshi, Yogesh, University of Maryland, College Park  
Joslin, Scott, University of Southern California  
Jouini, Oualid, École Centrale Paris  
Juergens, Jennifer, Drexel University  
Julio, Brandon, University of Oregon  
Juneja, Sandeep, Tata Institute of Fundamental Research  
Jung, Michael, New York University  
Kabra, Ashish, INSEAD  
Kacperczyk, Olenka, London Business School

## 2018 – All Reviewers

Kacperczyk, Aleksandra, Massachusetts Institute of Technology  
Kadan, Ohad, Washington University in St. Louis  
Kadiyala, Bharadwaj, Hong Kong University of Science and Technology  
Kadlec, Gregory, Virginia Polytechnic Institute and State University  
Kagan, Evgeny, Johns Hopkins University  
Kahraman, Bige, University of Oxford  
Kaiser, Ulrike, Vienna University of Economics and Business  
Kalay, Alon, Columbia University  
Kalcheva, Ivalina, University of California, Riverside  
Kale, Jayant, Northeastern University  
Kalkanci, Basak, Georgia Institute of Technology  
Kallus, Nathan, Cornell University  
Kalnins, Arturs, Cornell University  
Kamada, Yuichiro, University of California, Berkeley  
Kamble, Vijay, University of Illinois at Chicago  
Kamrad, Bardia, Georgetown University  
Kamstra, Mark, York University  
Kang, Hyo, University of California, Berkeley  
Kang, Polly, University of Pennsylvania  
Kang, Qiang, University of Miami  
Kang, Wanmo, Korea Advanced Institute of Science and Technology  
Kannan, P., University of Maryland, College Park  
Kanoria, Yash, Columbia University  
Kapadia, Nikunj, University of Massachusetts, Amherst  
Kapadia, Nishad, Tulane University  
Kaplan, Steven, Arizona State University  
Kaplan, Zack, Washington University in St. Louis  
Karagozoglu, Emin, Bilkent University  
Karolyi, Stephen, Carnegie Mellon University  
Kartasheva, Anastasia, Bank for International Settlements  
Karunakaran, Arvind, McGill University  
Kastl, Jakob, Princeton University  
Kasy, Max, Harvard University  
Katehakis, Michael, Rutgers University  
Katona, Zsolt, University of California, Berkeley  
Kaul, Aseem, University of Minnesota  
Kausar, Asad, American University  
Kaustia, Markku, Aalto University  
KC, Diwas, Emory University  
Ke, T. Tony, Massachusetts Institute of Technology  
Keck, Steffen, University of Vienna  
Keenan, Donald, University of Georgia  
Kelley, Eric, University of Arizona  
Kellner, Christian, University of Bonn  
Kelly, Bryan, Yale University  
Kelly, Erin, Massachusetts Institute of Technology  
Kelly, Peter, University of Notre Dame  
Kemahlioglu-Ziya, Eda, North Carolina State University  
Kempf, Elisabeth, University of Chicago  
Keppo, Jussi, National University of Singapore  
Kermani, Amir, University of California, Berkeley  
Kerr, Sari, Wellesley College  
Kerr, William, Harvard University  
Kesavan, Saravanan, University of North Carolina at Chapel Hill  
Keskin, N. Bora, Duke University  
Kessler, Judd, University of Pennsylvania  
Keswani, Aneel, University of London  
Khalmetzki, Kiryl, University of Cologne  
Khan, Urooj, Columbia University  
Khanna, Naveen, Michigan State University  
Khern-am-nuai, Warut, Purdue University  
Khessina, Olga, University of Illinois at Urbana–Champaign  
Khimich, Natalya, Drexel University  
Khwaja, Ahmed, University of Cambridge  
Kihlstrom, Richard, University of Pennsylvania  
Kiku, Dana, University of Illinois at Urbana–Champaign  
Kilduff, Gavin, New York University  
Kilic, Mete, University of Pennsylvania  
Kim, Antino, Indiana University Bloomington  
Kim, Dong Soo, Ohio State University  
Kim, Eun-Hee, Fordham University  
Kim, Hae-Young, New York Medical College  
Kim, Heeyon, Cornell University  
Kim, Hyunseob, Cornell University  
Kim, Jinwoo, Seoul National University  
Kim, Jun Sik, Incheon National University  
Kim, Jun, Hong Kong University of Science and Technology  
Kim, Keongtae, Chinese University of Hong Kong  
Kim, Kyonghee, Michigan State University

## 2018 – All Reviewers

Kim, Song-Hee, University of Southern California  
Kim, Soohun, Georgia Tech  
Kim, Taehyun, University of Notre Dame  
Kim, Tami, University of Virginia  
Kim, Yongtae, Santa Clara University  
Kim, Yunjeen, Boston University  
Kimhi, Ayal, Hebrew University of Jerusalem  
Kimmel, Robert, EDHEC Business School  
Kirchler, Erich, University of Vienna  
Kirchler, Michael, University of Innsbruck  
Kirk, Marcus, University of Florida  
Kirshner, Samuel, University of New South Wales  
Kisin, Roni, Analysis Group  
Kitchens, Brent, University of Virginia  
Klasa, Sandy, University of Arizona  
Klassen, Ken, University of Waterloo  
Klassen, Robert, University of Western Ontario  
Klasterin, Ted, University of Washington  
Klee, Elizabeth, Federal Reserve Board  
Klein, Jill, University of Melbourne  
Klein, Peter, Baylor University  
Kleinbaum, Adam, Dartmouth College  
Kleinlercher, Daniel, University of Innsbruck  
Kleywegt, Anton, Georgia Institute of Technology  
Klimm, Max, Humboldt University Berlin  
Knight, Andrew, Washington University in St. Louis  
Knupfer, Samuli, Norwegian Business School  
Knyazeva, Diana, U.S. Securities and Exchange Commission  
Kocabiyikoglu, Ayse, Bilkent University  
Kocaman, Ayse Selin, Bilkent University  
Koch, Adam, University of Virginia  
Koch, Alexander, Aarhus University  
Koch, Paul, University of Kansas  
Kocher, Martin, University of Munich  
Kock, Cristoffer, Federal Reserve Bank of Dallas  
Koenigsberg, Oded, London Business School  
Koester, Allison, Georgetown University  
Kogan, Shimon, Carnegie Mellon University  
Kogler, Christoph, Tilburg University  
Koh, Ping-Sheng, ESSEC Business School  
Kohli, Rajeev, Columbia University  
Kokkodis, Marios, Boston College  
Koksalan, Murat, Orta Dogu Teknik Universitesi  
Kolay, Sreya, University of California, Irvine  
Kolotilin, Anton, University of New South Wales  
Kolp, Manuel, Catholic University of Louvain  
Kong, Guangwen, University of Minnesota  
Koning, Rembrand, Harvard Business School  
Konstantinidi, Theodosia, City, University of London  
Kontek, Krzysztof, Warsaw School of Economics  
Kopa, Milos, Charles University  
Kopanyi-Peuker, Anita, University of Amsterdam  
Kops, Christopher, Alfred-Weber-Institute  
Korgaonkar, Sanket, Pennsylvania State University  
Korniotis, George, University of Miami  
Kornish, Laura, University of Colorado Boulder  
Korpeoglu, C. Gizem, University College London  
Körpeoğlu, Ersin, University College London  
Korteweg, Arthur, Stanford University  
Kosfeld, Michael, Goethe University  
Kosi, Urška, Paderborn University  
Kosova, Renata, Imperial College London  
Kostovetsky, Leonard, Boston College  
Kozegi, Botond, Central European University  
Kottimukkalur, Badrinath, George Washington University  
Kou, Steven, Boston University  
Kouwenberg, Roy, Mahidol University  
Kovach, Matthew, Virginia Polytechnic Institute and State University  
Kovacs, Balazs, Yale University  
Kovacs, Tunde, University of Massachusetts Lowell  
Kozak, Serhiy, University of Michigan  
Kraft, Holger, Goethe University  
Kraft, Pepa, HEC Paris  
Kraft, Tim, University of Virginia  
Krahmer, Daniel, University of Bonn  
Kräkel, Matthias, University of Bonn  
Kramer, Lisa, University of Toronto  
Kravet, Todd, University of Connecticut  
Kremer, Mirko, Frankfurt School of Finance & Management  
Krepely Pool, Veronika, Indiana University  
Kretschmer, Tobias, Ludwig Maximilian University of Munich  
Krieger, Joshua, Harvard Business School  
Krishnan, CNV, Case Western Reserve University

## 2018 – All Reviewers

Krishnan, Harish, University of British Columbia  
Krishnan, Jayanthi, Temple University  
Krishnan, Karthik, Northeastern University  
Krishnaswamy, Anilseh, Stanford University  
Kroll, Stephan, Colorado State University  
Kroos, Peter, University of Amsterdam  
Krueger, Fabian, Alfred-Weber-Institute  
Kruger, Sam, University of Texas at Austin  
Kube, Sebastian, University of Bonn  
Kubilay, Elif, Bocconi University  
Kübler, Dorothea, WZB Berlin Social Science Center  
Kuby, Michael, Arizona State University  
Kuchler, Theresa, New York University  
Kugler, Tamar, University of Arizona  
Kuhn, Jeffrey, University of North Carolina at Chapel Hill  
Kulchina, Elena, Duke University  
Kull, Thomas, Arizona State University  
Kumar, Alok, University of Miami  
Kumar, Ravi, Cornell University  
Kumar, Vineet, Yale University  
Kung, Howard, London Business School  
Kunnumkal, Sumit, Indian School of Business  
Kupor, Daniella, Boston University  
Kuppuswamy, Venkat, Northeastern University  
Kurlat, Pablo, Stanford University  
Kurt, Ahmet, Suffolk University  
Kurtulus, Mumin, Vanderbilt University  
Kush, Jonathan, University of Massachusetts Dartmouth  
Kushnir, Alexey, Carnegie Mellon University  
Kusterer, David, University of Cologne  
Kuwabara, Ko, Columbia University  
Kvaloy, Ola, University of Stavanger  
Kwasnica, Anthony, Pennsylvania State University  
Kwon, Hyeokkoo Eric, Korea Advanced Institute of Science and Technology  
Kwon, Juhee, Korea Advanced Institute of Science and Technology  
Kyle, Margaret, MINES ParisTech  
Labianca, Giuseppe (Joe), University of Kentucky  
Labro, Eva, University of North Carolina at Chapel Hill  
Lacetera, Nicola, University of Toronto  
Lagaras, Spyridon, University of Pittsburgh  
Lahey, Joanna, Texas A&M University  
Lahiri, Atanu, University of Texas at Dallas  
Lai, Guoming, University of Texas at Austin  
Lai, Jason, University of Chicago  
Lam, Chungsang, Clemson University  
Lam, Henry, Columbia University  
Lamberson, P. J., University of California, Los Angeles  
Lambert, Thomas, Erasmus University  
Lamberton, Cait, University of Pittsburgh  
Lambie-Hansen, Lauren, Federal Reserve Bank of Philadelphia  
Lambrecht, Anja, London Business School  
Landis, Blaine, University College London  
Landry, Peter, University of Toronto  
Landoigt, Tim, University of Pennsylvania  
Langberg, Nisan, University of Houston  
Langenmayr, Dominika, Katholische Universität Eichstätt-Ingolstadt  
Langer, Nishtha, Rensselaer Polytechnic Institute  
Lapré, Michael, Vanderbilt University  
Larkin, Ian, University of California, Los Angeles  
Larkin, Yelena, York University  
Larrain, Mauricio, Pontificia Universidad Católica de Chile  
Larsen, Brad, Stanford University  
Lauermann, Stephan, University of Bonn  
Laufer, Steven, Federal Reserve Board  
Laux, Volker, University of Texas at Austin  
Lavieri, Mariel, University of Michigan  
Law, Kelvin, Nanyang Business School  
Lawrence, Alastair, University of California, Berkeley  
Lazzarini, Sergio, Ibmec São Paulo  
Le Mens, Gael, Pompeu Fabra University  
Le, Anh, Pennsylvania State University  
Le, Hanh, University of Illinois at Chicago  
Leahey, Erin, University of Arizona  
Lecuona, Ramon, Duke University  
Lee, Dokyun, Carnegie Mellon University  
Lee, Donald, Yale University  
Lee, Dongwon, Hong Kong University of Science and Technology  
Lee, Hye Seung (Grace), Fordham University  
Lee, Josh, University of Georgia  
Lee, Jung Hoon, Tulane University  
Lee, Junghee, Tulane University  
Lee, Lian Fen, Boston College

## 2018 – All Reviewers

Lee, Matthew, INSEAD  
Lee, Michael, University of California, Davis  
Lee, Sang-yong Tom, Hanyang University  
Lee, Seoungwoo, Tulane University  
Lee, Shun-Yang, University of Texas at Austin  
Lee, Stephanie, University of Washington  
Lee, Taewoo, University of Houston  
Lefouilli, Yassine, Toulouse School of Economics  
Lehman, David, University of Virginia  
Leibbrandt, Andreas, Monash University  
Leider, Stephen, University of Michigan  
Leiponen, Aija, Cornell University  
Leitner, Yaron, Federal Reserve Bank of Philadelphia  
Lejarraga, Tomas, University of the Balearic Islands  
Lejeune, Miguel, George Washington University  
Lennox, Clive, University of Southern California  
Leonello, Agnese, European Central Bank  
Lergetporer, Philipp, Ifo Institute for Economic Research  
Lescourret, Laurence, ESSEC Business School  
Leshno, Jacob, Columbia University  
Lesmond, David, Tulane University  
Leung, Ming, University of California, Riverside  
Leus, Roel, KU Leuven  
Leuz, Christian, University of Chicago  
Levesque, Moren, York University  
Levine, Emma, University of Pennsylvania  
Levine, Oliver, University of Wisconsin–Madison  
Levine, Ross, University of California, Berkeley  
Levit, Doron, University of Pennsylvania  
Levy, Matthew, London School of Economics and Political Science  
Lewandowski, Michal, Warsaw School of Economics  
Lewellen, Jonathan, Dartmouth College  
Lewis, Demetrius, Emory University  
Lewis, Greg, Microsoft Research  
Lewis, Joshua, University of Pennsylvania  
Lewis-Western, Melissa, Brigham Young University  
l'Haridon, Olivier, University of Rennes 1  
Li, Alice, Ohio State University  
Li, Andrew, Carnegie Mellon University  
Li, Beibei, New York University  
Li, Bo, Tsinghua University  
Li, Chan, University of Pittsburgh  
Li, Chen, Baruch College  
Li, Chen, Erasmus University Rotterdam  
Li, Danielle, Harvard University  
Li, Dongmei, University of South Carolina  
Li, Duoze, Chinese University of Hong Kong  
Li, Erica, Cheung Kong Graduate School of Business  
Li, Frank, Singapore Management University  
Li, Geng, Federal Reserve Board  
Li, Guang, Queen's University  
Li, Hongyi, University of New South Wales  
Li, Hui, Carnegie Mellon University  
Li, Jia, Wake Forest University  
Li, Jin, Northwestern University  
Li, Jun, University of Michigan  
Li, Jun, University of Texas at Dallas  
Li, Kai, University of British Columbia  
Li, Krista, Indiana University  
Li, Laura Yue, University of Illinois at Urbana–Champaign  
Li, Meng, Rutgers University  
Li, Nan, university of toronto  
Li, Qing, Hong Kong University of Science and Technology  
Li, Rong, Syracuse University  
Li, Shan, Baruch College  
Li, Shaojin, Shanghai University of Finance and Economics  
Li, Shengwu, Stanford University  
Li, Sherry, University of Texas at Dallas  
Li, Shi, University at Buffalo  
Li, Shibo, Indiana University  
Li, Si, Wilfrid Laurier University  
Li, Siqi, Santa Clara University  
Li, Sophia, Rutgers University  
Li, Tao, Santa Clara University  
Li, Tao, University of Florida  
Li, Tian, Hong Kong University of Science and Technology  
Li, Wei, University of British Columbia  
Li, Xi, City University of Hong Kong  
Li, Xi, Temple University  
Li, Xiaobo, National University of Singapore  
Li, Xinlong, University of Toronto  
Li, Xitong, HEC Paris  
Li, Yang, Chinese University of Hong Kong  
Li, Ye, Ohio State University  
Li, Ye, University of California, Riverside

## 2018 – All Reviewers

Li, Yinghua, Arizona State University  
Li, Yuanzhi, Temple University  
Li, Yue, University of Toronto  
Li, Zhuoxin (Allen), Boston College  
Liang, Bing, University of Massachusetts  
Liang, Chao, Cheung Kong Graduate School of Business  
Liang, Hao, Singapore Management University  
Liao, Rose, Rutgers University  
Liao, Scott, University of Toronto  
Liao, Yuan, Rutgers University  
Libby, Theresa, University of Waterloo  
Liberali, Gui, Erasmus University  
LiCalzi, Marco, Ca' Foscari University of Venice  
Lichtendahl, Casey, University of Virginia  
Lie, Erik, University of Iowa  
Liechty, John, Pennsylvania State University  
Lillis, Anne, University of Melbourne  
Lim, Andrew, National University of Singapore  
Lim, Hyunwoo, Pennsylvania State University  
Lim, Michael, Seoul National University  
Lim, Noah, National University of Singapore  
Lim, W. S., National University of Singapore  
Lin, Chen, University of Hong Kong  
Lin, Jianjing, Tulane University  
Lin, Leming, University of Pittsburgh  
Lin, Mingfeng, Georgia Institute of Technology  
Lin, Song, Hong Kong University of Science and Technology  
Lin, Yu-Kai, Georgia State University  
Linardi, Sera, University of Pittsburgh  
Lindsey, Laura, Arizona State University  
Ling, David, University of Florida  
Linn, Matthew, University of Massachusetts  
Lipman, Bart, Boston University  
Lipton, Zack, Carnegie Mellon University  
Lisic, Ling, Virginia Polytechnic Institute and State University  
Litov, Lubomir, University of Oklahoma  
Liu, Baixiao, Florida State University  
Liu, Ben, City University of Hong Kong  
Liu, Bibo, Tsinghua University  
Liu, Binying, Hong Kong University of Science and Technology  
Liu, Chengwei, University of Warwick  
Liu, Chris, University of Toronto  
Liu, De, University of Minnesota  
Liu, Edith, Federal Reserve Board  
Liu, Guangwu, City University of Hong Kong  
Liu, Hong, Washington University in St. Louis  
Liu, Hongju, University of Connecticut  
Liu, Jane, Peking University  
Liu, Lin, University of Central Florida  
Liu, Liu, University of Colorado Boulder  
Liu, Nan, Boston College  
Liu, Peggy, University of Pittsburgh  
Liu, Ping, Purdue University  
Liu, Qian, Hong Kong University of Science and Technology  
Liu, Qiang, Purdue University  
Liu, Qianqiu, University of Hawaii  
Liu, Qing, University of Wisconsin–Madison  
Liu, Tracy, Tsinghua University  
Liu, Xiao, New York University  
Liu, Xiao, University of Utah  
Liu, Xingyi, Julius-Maximilians-Universität Würzburg  
Liu, Xuewen, Hong Kong University of Science and Technology  
Liu, Yan, Texas A&M University  
Liu, Yan, Tianjin University  
Liu, Ying, University of Massachusetts Amherst  
Liu, Yong, University of Arizona  
Liu, Yunan, North Carolina State University  
Liu, Yunchuan, University of Illinois at Urbana–Champaign  
Llanes, Gaston, Pontificia Universidad Católica de Chile  
Lobel, Ilan, New York University  
Lobo, Miguel, INSEAD  
Lockhart, Brandon, Clemson University  
Loginova, Oksana, University of Missouri  
Loh, Roger, Singapore Management University  
Long, Elisa, University of California, Los Angeles  
Long, Xiaoyang, University of Wisconsin–Madison  
Long, Zhuoyu, Chinese University of Hong Kong  
Louis, Henock, Pennsylvania State University  
Lount, Robert, Ohio State University  
Lourie, Ben, University of California, Davis  
Lovallo, Dan, University of Sydney  
Lovett, Mitch, University of Rochester  
Lovo, Stefano, HEC Paris  
Low, Angie, Nanyang Business School  
Lowery, J., University of Texas at Austin  
Lu, Andrea, University of Melbourne

## 2018 – All Reviewers

Lu, Haitian, Hong Kong Polytechnic University  
Lu, Jingfeng, National University of Singapore  
Lu, Mengshi, Purdue University  
Lu, Susan, Purdue University  
Lu, Tong, University of Houston  
Lu, Ye, City University of Hong Kong  
Lu, Yiqing, New York University Shanghai  
Lu, Yixin, George Washington University  
Lu, Zhongjin, University of Georgia  
Luca, Michael, Harvard Business School  
Lucas, Deborah, Massachusetts Institute of Technology  
Luhan, Wolfgang, University of Portsmouth  
Lungeanu, Razvan, Northeastern University  
Luo, Hong, Harvard Business School  
Luo, Jiao, University of Minnesota  
Luo, Lan, University of Southern California  
Luo, Shuqing, University of Hong Kong  
Luo, Xueming, Temple University  
Lyandres, Evgeny, Boston University  
Lyle, Matthew, Northwestern University  
Lyons, Liz, University of California, San Diego  
Ma, Liye, University of Maryland, College Park  
Ma, Paul, University of Minnesota  
Ma, Song, Yale University  
Maas, Victor, University of Amsterdam  
Maccheroni, Fabio, Bocconi University  
Macchiavello, Rocco, London School of Economics and Political Science  
Macher, Jeffrey, Georgetown University  
Macis, Mario, Johns Hopkins University  
MacKay, Peter, Hong Kong University of Science and Technology  
Mackinlay, Andrew, Virginia Polytechnic Institute and State University  
MacLeod, Bentley, Columbia University  
Madarasz, Kristof, London School of Economics and Political Science  
Madhavan, Ananth, BlackRock, Inc.  
Madsen, Joshua, University of Minnesota  
Maffett, Mark, University of Chicago  
Magesan, Arvind, University of Calgary  
Maglaras, Costis, Columbia University  
Mago, Shakun, University of Richmond  
Mahieux, Lucas, Tilburg University  
Mahlendorf, Matthias, Frankfurt School of Finance & Management  
Mailath, George, University of Pennsylvania  
Maille, Patrick, IMT Atlantique  
Majors, Tracie, University of Southern California  
Mak, Ho-Yin, University of Oxford  
Mak, Vincent, University of Cambridge  
Makhdoumi, Ali, Massachusetts Institute of Technology  
Maki, Kanetaka, University of California, San Diego  
Maleki, Hosein, Temple University  
Malekian, Azarakhsh, University of Toronto  
Malenko, Nadya, Boston College  
Malinova, Katya, University of Toronto  
Malioutov, Dmitry, D. E. Shaw Group  
Malkhozov, Aytek, Federal Reserve Board  
Malkoc, Selin, Ohio State University  
Malladi, Suraj, Stanford University  
Mallapragada, Girish, Indiana University  
Malliaris, Steve, Yale University  
Mallucci, Paola, University of Wisconsin–Madison  
Mamani, Hamed, University of Washington  
Manconi, Alberto, Bocconi University  
Manela, Asaf, Washington University in St. Louis  
Mangum, Kyle, Georgia State University  
Mani, Vidya, Pennsylvania State University  
Manley, James, Towson University  
Mann, William, University of California, Los Angeles  
Manshadi, Vahideh, Yale University  
Mantin, Benny, University of Luxembourg  
Manzini, Paola, University of Sussex  
Mao, Yifei, Cornell University  
Maoret, Massimo, University of Navarra  
Marechal, Michel Andre, University of Zurich  
Marinesci, Simone, University of Pennsylvania  
Marinovic, Ivan, Stanford University  
Mariotti, Marco, Queen Mary University of London  
Markakis, Mihalis, IESE Business School  
Markant, Douglas, University of North Carolina at Charlotte  
Markle, Alex, University of Pennsylvania  
Marklund, Johan, Lund University  
Markou, Panos, University of Cambridge  
Markovich, Sarit, Northwestern University  
Marla, Lavanya, University of Illinois at Urbana–Champaign  
Marley, Tony, University of Victoria

## 2018 – All Reviewers

Marlowe, Justin, University of Washington  
Marr, Jennifer, Georgia Institute of Technology  
Marshall, Guillermo, University of Illinois at Urbana–Champaign  
Marti, Rafael, University of Valencia  
Martignoni, Dirk, USI Lugano  
Martin, Daniel, Paris School of Economics  
Martin, Melissa, University of Illinois at Chicago  
Martin, Xiumin, Washington University in St. Louis  
Martinez Jerez, F. Asis, University of Notre Dame  
Marx, Leslie, Duke University  
Marx, Matt, Boston University  
Mäs, Michael, University of Groningen  
Mashruwala, Raj, University of Calgary  
Mason, Malia, Columbia University  
Massey, Cade, University of Pennsylvania  
Masulis, Ronald, University of New South Wales  
Matejka, Filip, Centrum pro Ekonomicky Vyzkum a Doktorske Studium  
Matějka, Michal, Arizona State University  
Matisoff, Daniel, Georgia Tech  
Matsushima, Noriaki, Osaka University  
Mauer, David, University of North Carolina at Charlotte  
Mauskapf, Michael, Columbia University  
Mayzlin, Dina, Yale University  
Mazumder, Rahul, Massachusetts Institute of Technology  
McConnell, Margaret, Harvard University  
McCoy, John, University of Pennsylvania  
McCullough, Jeffrey, University of Michigan  
McDevitt, Ryan, University of Rochester  
McDonald, Bill, University of Notre Dame  
McDonald, Rebecca, University of Birmingham  
McElheran, Kristina, University of Toronto  
McFowland, Edward, University of Minnesota  
McInnis, John, University of Texas at Austin  
McKenzie, Craig, University of California, San Diego  
McMullin, Jeff, Indiana University  
McShane, Blakeley, Northwestern University  
McVay, Sarah, University of Washington  
McWilliams, Bruce, Instituto Tecnológico Autónomo de México  
Medhat, Mamdouh, University of London  
Meer, Jonathan, Texas A&M University  
Mehra, Amit, University of Texas at Dallas  
Mehrotra, Mili, University of Minnesota  
Mehta, Mihir, University of Michigan  
Meier, Stephan, Columbia University  
Mejia, Jorge, Indiana University  
Melero, Eduardo, Universidad Carlos III de Madrid  
Melessa, Samuel, University of Iowa  
Melville, Nigel, University of Michigan  
Melzer, Brian, Northwestern University  
Menegatti, Mario, University of Parma  
Meneghetti, Costanza, University of West Virginia  
Meng, Juanjuan, Peking University  
Meng, Xiaojing, New York University  
Menges, Jochen, WHU – Otto Beisheim School of Management  
Menkhoff, Lukas, Leibniz University Hannover  
Menon, Anoop, University of Pennsylvania  
Menon, Nirup, George Mason University  
Merchant, Kenneth, University of Southern California  
Merkle, Christoph, Kühne Logistics University  
Merkley, Ken, Cornell University  
Merkley, Kenneth, Indiana University  
Merrick, Jason, Virginia Commonwealth University  
Merrill, Craig, Brigham Young University  
Mersereau, Adam, University of North Carolina at Chapel Hill  
Meschke, Felix, University of Kansas  
Metzger, Daniel, Stockholm School of Economics  
Meyer, Mary, Colorado State University  
Miao, Chun-Hui, University of South Carolina  
Miao, Wang, Peking University  
Michaeli, Beatrice, University of California, Los Angeles  
Michaelides, Alexander, Imperial College Business School  
Michas, Paul, University of Arizona  
Michaud, Pierre-Carl, HEC Paris  
Michels, Jeremy, University of Pennsylvania  
Michenaud, Sebastien, DePaul University  
Mierendorff, Konrad, University College London  
Miettinen, Topi, Hanken School of Economics  
Mihm, Jurgen, INSEAD  
Mihov, Vassil, Texas Christian University

## 2018 – All Reviewers

Milgrom, Paul, Stanford University  
Miller, Alan, University of Haifa  
Miller, Brian, Indiana University  
Miller, David, University of Michigan  
Miller, Greg, University of Michigan  
Miller, Joshua, Bocconi University  
Milliken, Frances, New York University  
Mills, Alex, Indiana University Bloomington  
Milovac, Melanie, INSEAD  
Minnis, Michael, University of Chicago  
Mintz, Yonatan, University of California, Berkeley  
Minutti-Meza, Miguel, University of Miami  
Mishra, Anant, University of Minnesota  
Mishra, Debasis, Indian Statistical Institute  
Mishra, Himanshu, University of Utah  
Mišić, Velibor, University of California, Los Angeles  
Mislavsky, Robert, Johns Hopkins University  
Misra, Kanishka, University of California, San Diego  
Mitchell, Daniel, University of Minnesota  
Mittendorf, Brian, Ohio State University  
Mize, Trent, Purdue University  
Mkrtchyan, Anahit, Northeastern University  
Mo, Haitao, Louisiana State University  
Mobbs, Shawn, University of Alabama  
Mochon, Daniel, Tulane University  
Moen, Mahka, University of North Carolina  
Moeller, Marc, University of Bern  
Mohanram, Partha, University of Toronto  
Mollerstrom, Johanna, George Mason University  
Mollick, Ethan, University of Pennsylvania  
Mollner, Joshua, Northwestern University  
Momot, Ruslan, HEC Paris  
Monahan, Steven, INSEAD  
Montes, Rodrigo, Compass Lexecon  
Montez, Joao, University of Lausanne  
Montoya, Ricardo, University of Chile  
Moon, Alice, University of Pennsylvania  
Moon, James, Georgia Institute of Technology  
Moon, Ken, University of Pennsylvania  
Moore, Don, University of California, Berkeley  
Moore, Sarah, University of Alberta  
Moreira, Alan, Yale University  
Morellec, Erwan, École polytechnique fédérale de Lausanne  
Moreno, Antonio, Harvard Business School  
Moreno-Ternero, Juan, Universidad Pablo de Olavide  
Morewedge, Carey, Boston University  
Moritz, Brent, Pennsylvania State University  
Mormann, Milica, University of Miami  
Morrill, Thayer, North Carolina State University  
Morse, Adair, University of California, Berkeley  
Mortal, Sandra, University of Alabama  
Morton, Alec, University of Strathclyde  
Mostagir, Mohamed, University of Michigan  
Moulton, Pamela, Cornell University  
Mu, Liying, University of Delaware  
Mu, Xiaosheng, Yale University  
Muchnik, Lev, New York University  
Muermann, Alexander, Vienna University of Economics and Business  
Muir, Tyler, Yale University  
Mukharlamov, Vladimir, Georgetown University  
Mukherjee, Abhiroop, Hong Kong University of Science and Technology  
Mukherjee, Rajiv, Southern Methodist University  
Muller, Alfred, University of Siegen  
Müller-Trede, Johannes, University of Navarra  
Mullett, Timothy, University of Warwick  
Mumford, Kevin, Purdue University  
Mummalaneni, Simha, University of Washington  
Mun, Eunmi, University of Illinois at Urbana-Champaign  
Münster, Johannes, University of Cologne  
Murfin, Justin, Yale University  
Murgoci, Agatha Murgoci, Aarhus University  
Murooka, Takeshi, Osaka University  
Murphy, Ryan, ETH Zurich  
Murray, Scott, Georgia State University  
Murthi, B. P. S., University of Texas at Dallas  
Murthy, Karthyek, Singapore University of Technology and Design  
Muslu, Volkan, University of Houston  
Mussweiler, Thomas, University of Cologne  
Mustafee, Navonil, University of Exeter  
Muthulingam, Suresh, Pennsylvania State University  
Myers, Brett, Texas Tech University  
Myers, Linda, University of Tennessee  
Nadauld, Taylor, Brigham Young University

## 2018 – All Reviewers

Naecker, Jeffrey, Wesleyan University  
Nagaraj, Abhishek, University of California, Berkeley  
Nagarajan, Mahesh, University of British Columbia  
Nageswaran, Leela, University of Washington  
Nagle, Frank, University of Southern California  
Naik, Prasad, University of California, Davis  
Nakkas, Alper, University of Texas at Arlington  
Nalca, Arcan, Queen's University  
Nallareddy, Suresh, Duke University  
Nam, Jayoung, Southern Methodist University  
Nan, Lin, Purdue University  
Nanda, Ramana, Harvard Business School  
Nanda, Vikram, University of Texas at Dallas  
Narayanan, Sridhar, Stanford University  
Nardari, Federico, University of Melbourne  
Nardotto, Mattia, Katholieke Universiteit Leuven  
Narita, Yusuke, Yale University  
Nasiry, Javad, Hong Kong University of Science and Technology  
Nassiri, Shima, University of Michigan  
Natarajan, Karthik, Singapore University of Technology and Design  
Natividad, Gabriel, University of Piura  
Naughton, James, Northwestern University  
Naumovska, Ivana, INSEAD  
Naveen, Lalitha, Temple University  
Neamtiu, Monica, University of Arizona  
Nediak, Mikhail, Queen's University  
Negoescu, Diana, University of Minnesota  
Nekrasov, Alexander, University of Illinois at Chicago  
Nelson, Leif, University of California, Berkeley  
Nelson, Scott, Massachusetts Institute of Technology  
Nessa, Michelle, Michigan State University  
Neuhierl, Andreas, University of Notre Dame  
Newman, Andrew, University of South Carolina  
Newton, David, University of Bath  
Nezafat, Mahdi, Michigan State University  
Nezlobin, Alexander, University of California, Berkeley  
Ng, David, Cornell University  
Ng, Jeff, Chinese University of Hong Kong  
Ng, Weiyi, University of California, Berkeley  
Nguyen, Giang, Pennsylvania State University  
Nguyen, Quoc, University of Illinois at Chicago  
Nguyen, Thanh, Purdue University  
Nguyen, Viet Anh, École polytechnique fédérale de Lausanne  
Nguyen, Vinh, University of Hong Kong  
Ngwe, Donald, Harvard Business School  
Ni, Debing, University of Electronic Science and Technology of China  
Ni, Jian, Johns Hopkins University  
Ni, Sophie, Hong Kong Baptist University  
Nian, Tingting, University of California, Davis  
Nichols, Craig, Syracuse University  
Nickerson, Jackson, Washington University in St. Louis  
Nicolaou, Nicos, University of Warwick  
Nicoletti, Allison, University of Pennsylvania  
Niedemayer, Andras, Paris-Dauphine University  
Niederhoff, Julie, Syracuse University  
Nielsen, Kasper, Hong Kong University of Science and Technology  
Niessner, Marina, AQR Capital Management  
Nijs, Vincent, University of California, San Diego  
Nikolov, Boris, HEC Paris  
Nilsson, Mattias, U.S. Securities and Exchange Commission  
Nini, Greg, Drexel University  
Nishida, Mitsukuni, Johns Hopkins University  
Nishihara, Michi, Osaka University  
Nistor, Cristina, Chapman University  
Nittala, Lakshmi, University of Dayton  
Niu, Baozhuang, Sun Yat-sen University  
Nocetti, Diego, Clarkson University  
Noda, Shunya, Stanford University  
Nohadani, Omid, Northwestern University  
Nordqvist, Mattias, Jönköping International Business School  
Normann, Hans-Theo, University of Duesseldorf  
Nosenzo, Daniele, University of Nottingham  
Nowak, Eric, Università della Svizzera italiana  
Nunez, Matias, Centre National de la Recherche Scientifique  
Nurre, Sarah, University of Arkansas  
Nyberg, Henri, University of Turku  
Nyugen, Hoai-Luu, University of California, Berkeley  
O'Brien, Ed, University of Chicago  
Obukhova, Elena, McGill University

## 2018 – All Reviewers

Ødegaard, Fredrik, University of Western Ontario  
O'Doherty, Michael, University of Missouri  
Ody, Christopher, Northwestern University  
Oery, Aniko, Yale University  
Oesch, David, University of Zurich  
Oettl, Alex, Georgia Institute of Technology  
Oexl, Regine, University of Innsbruck  
Oeystein, Daljord, University of Chicago  
Offerman, Theo, University of Amsterdam  
Oh, Joo Hee, Erasmus University  
Oh, Sewing, University of Illinois at Urbana-Champaign  
Ohn, Heejin, University of Iowa  
O'Kelly, Morton, Ohio State University  
Oliva, Rogelio, Texas A&M University  
Olivola, Christopher, Carnegie Mellon University  
Olschewski, Sebastian, University of Basel  
Omer, Thomas, University of Nebraska-Lincoln  
Onderstal, Sander, University of Amsterdam  
Opp, Marcus, University of California, Berkeley  
Oprea, Ryan, University of British Columbia  
Oraipoulos, Nektarios, Cambridge University  
Orhun, A. Yesim, University of Michigan  
Orlov, Dmitry, University of Rochester  
Ormazabal, Gaizka, IESE Business School  
Ormiston, Margaret, George Washington University  
Ornthanalai, Chayawat, University of Toronto  
Orquin, Jacob, Aarhus University  
Ors, Evren, HEC Paris  
Orsdemir, Adem, University of California, Riverside  
Ortmann, Andreas, University of New South Wales  
Orzen, Henrik, University of Mannheim  
Osadchiy, Nikolay, Emory University  
Osborne, Matthew, University of Toronto  
Othman, Abraham, Carnegie Mellon University  
Ottaviani, Marco, Bocconi University  
Otter, Thomas, Goethe University  
Otto, Clemens, HEC Paris  
Ouimet, Paige, University of North Carolina  
Ovchinnikov, Anton, Queens University  
Owen, Zachary, Massachusetts Institute of Technology  
Ozel, Naim Bugra, University of Texas at Dallas  
Ozkan, Erhun, University of Southern California  
Paccagnini, Alessia, University College Dublin  
Pacelli, Joseph, Indiana University  
Pacheco-de-Almeida, Gonçalo, HEC Paris  
Pachur, Thorsten, Max Planck Institute for Human Development  
Paciorek, Andrew, Federal Reserve Board  
Packard, Heidi, University of Michigan  
Padmanabhan, Balaji, University of South Florida  
Page, Lionel, Queensland University of Technology  
Pagel, Michaela, Columbia University  
Paharia, Neeru, Georgetown University  
Pai, Mallesh M, Rice University  
Paik, Yongwook, Washington University in St. Louis  
Palia, Darius, Rutgers University  
Palley, Asa, Indiana University Bloomington  
Palmer, Christopher, University of California, Berkeley  
Palomeras, Neus, Universidad Carlos III de Madrid  
Pan, Jessica, National University of Singapore  
Pan, Xiajun, University of Florida  
Pan, Yihui, University of Utah  
Pancras, Joseph, University of Connecticut  
Pang, Min-Seok, Temple University  
Pang, Zhan, Purdue University  
Paoella, Lionel, University of Cambridge  
Papanastasiou, Yiangos, University of California, Berkeley  
Papier, Felix, ESSEC Business School  
Park, Eric, University of British Columbia  
Park, So-Eun, University of British Columbia  
Park, Young-Hoon, Cornell University  
Park, YoungKi, George Washington University  
Parker, Christopher, Pennsylvania State University  
Parker, Rodney, University of Chicago  
Parlaktürk, Ali, University of North Carolina at Chapel Hill  
Pataconi, Andrea, University of East Anglia  
Patatoukas, Panos, University of California, Berkeley  
Pathania, Vikram, University of Sussex  
Paul, Anand, University of Florida  
Pauwels, Koen, Northeastern University  
Pawliczek, Andrea, University of Colorado

## 2018 – All Reviewers

Pawlina, Grzegorz, Lancaster University  
Payzan-LeNestour, Elise, University of New South Wales  
Pedraza-Martinez, Alfonso, Indiana University Bloomington  
Peer, Eyal, Bar-Ilan University  
Peijnenburg, Kim, HEC Paris  
Pekeč, Saša, Duke University  
Pelizzon, Loriana, Ca' Foscari University of Venice  
Pelletier, Denis, North Carolina State University  
Penasse, Julien, University of Luxembourg  
Pender, Jamol, Cornell University  
Peng, Jing, University of Connecticut  
Peng, Lin, Baruch College  
Peng, Xianhua, Peking University  
Peng, Xiaoshan, Indiana University Bloomington  
Pennacchi, George, University of Illinois  
Pennington-Cross, Anthony, Marquette University  
Pentland, Brian, Michigan State University  
Perdikaki, Olga, University of South Carolina  
Perez Cavazos, Gerardo, Harvard Business School  
Perez, Diego, New York University  
Perez-Truglia, Ricardo, University of California, Los Angeles  
Perrakis, Stylianos, Concordia University  
Persson, Lars, Research Institute of Industrial Economics  
Pesendorfer, Martin, London School of Economics and Political Science  
Petacchi, Reining, Georgetown University  
Peter, Richard, University of Iowa  
Peters, Florian, University of Amsterdam  
Peters, Hans, Maastricht University  
Peters, Ryan, Tulane University  
Petersen, J., Pennsylvania State University  
Peterson, Kyle, University of Oregon  
Petkova, Ralitsa, Case Western Reserve University  
Petrie, Ragan, Texas A&M University  
Petrik, Marek, University of New Hampshire  
Petrovits, Christine, College of William and Mary  
Peukert, christian, Católica Lisbon  
Peura, Heikki, Imperial College Business School  
Peysakhovich, Alexander, Facebook  
Pfeil, Sebastian, Erasmus University Rotterdam  
Phalippou, Ludo, University of Oxford  
Phan, Tuan, National University of Singapore  
Phillips, Gordon, Dartmouth College  
Pierce, Joshua, University of Alabama  
Pierce, Lamar, Washington University in St. Louis  
Piezunka, Henning, INSEAD  
Pikulina, Elena, University of British Columbia  
Pixton, Clark, Massachusetts Institute of Technology  
Pizzini, Mina, Texas State University  
Plassman, Hilke, INSEAD  
Plazzi, Alberto, University of Lugano  
Ploner, Matteo, University of Trento  
Plonsky, Ori, Duke University  
Plumlee, Marlene, University of Utah  
Pocheptsova, Anastasiya, University of Arizona  
Podinovski, Victor, Loughborough University  
Pogrebna, Ganna, Alan Turing Institute  
Polites, Grete, Kent State University  
Pollet, Joshua, University of Illinois  
Pondorfer, Andreas, University of Bonn  
Pontikes, Elizabeth, University of Chicago  
Popov, Alexander, European Central Bank  
Porcher, Simon, Sorbonne Business School  
Porter, David, Chapman University  
Possamai, Dylan, Columbia University  
Post, Thierry, Koç University  
Post, Thomas, Maastricht University  
Postek, Krzysztof, Technion – Israel Institute of Technology  
Postrel, Steven, University of California, Davis  
Potters, Jan, Tilburg University  
Povel, Paul, University of Houston  
Powell, Mike, Northwestern University  
Powers, Eric, University of South Carolina  
Prabhala, Nagpurnanand, University of Maryland, College Park  
Prado, Melissa, Nova School of Business and Economics  
Prakash, Rachna, University of Mississippi  
Prat, Andrea, Columbia University  
Preston, David, Texas Christian University  
Price, Joseph, Brigham Young University  
Prilmeier, Robert, Tulane University  
Proserpio, Davide, University of Southern California

## 2018 – All Reviewers

Proto, Eugenio, University of Warwick  
Prowse, Victoria, Purdue University  
Pruitt, Seth, Arizona State University  
Puller, Steven, Texas A&M University  
Puranam, Dinesh, University of Southern California  
Puranam, Phanish, INSEAD  
Purnanandam, Amiyatosh, University of Michigan  
Purohit, Debu, Duke University  
Pye, Jessica, Arizona State University  
Pyun, SungJune, National University of Singapore  
Qi, Anyan, University of Texas at Dallas  
Qian, Meijun, Australian National University  
Qian, Sean, Carnegie Mellon University  
Qian, Wenlan, National University of Singapore  
Qian, Yi, University of British Columbia  
Qian, Yiming, University of Iowa  
Qiu, Liangfei, University of Florida  
Quercia, Simone, University of Bonn  
Quinn, Phil, University of Washington  
Quintane, Eric, University of Los Andes  
Racionero, Maria, Australian National University  
Radhakrishnan, Suresh, University of Texas at Dallas  
Raghunathan, Srinivasan, University of Texas at Dallas  
Rahmandad, Hazhir, Massachusetts Institute of Technology  
Rahmani, Morvarid, Georgia Institute of Technology  
Rai, Arti, Duke University  
Raith, Michael, University of Rochester  
Rajan, Uday, University of Michigan  
Ramachandran, Karthik, Georgia Institute of Technology  
Ramalingegowda, Santhosh, University of Georgia  
Ramaprasad, Jui, McGill University  
Ramcharan, Rodney, University of Southern California  
Randhawa, Ramandeep, University of Southern California  
Ranehill, Eva, University of Zurich  
Rangan, Srinivasan, Indian Institute of Management, Bangalore  
Ranganathan, Aruna, Stanford University  
Ranjan, Bhoomija, Brandeis University  
Ransbotham, Sam, Boston College  
Rantakari, Heikki, University of Rochester  
Rantala, Ville, University of Miami  
Rao, Akshay, University of Minnesota  
Rao, Anita, Stanford University  
Rao, Raghunath, University of Texas at Austin  
Rao, Vithala R., Cornell University  
Rapach, David, Saint Louis University  
Rath, Sandeep, University of North Carolina at Chapel Hill  
Rathje, Jason, Stanford University  
Rau, Raghu, University of Cambridge  
Rauter, Thomas, University of Chicago  
Ray, Korok, Texas A&M University  
Ray, Soumya, National Tsing Hua University  
Ray, Sugata, University of Alabama  
Raymond, Collin, Amherst College  
Rebello, Michael, University of Texas at Dallas  
Recalde, Maria, University of Melbourne  
Redden, Jjoseph, University Of Minnesota  
Rees, Lynn, Utah State University  
Rees-Jones, Alex, Cornell University  
Reggiani, Tommaso, University of Cologne  
Regner, Tobias, University of Jena  
Reguant, Mar, Northwestern University  
Rei, Walter, Université du Québec à Montréal  
Reichstein, Toke, Copenhagen Business School  
Reiley, David, Pandora  
Reimers, Imke, Northeastern University  
Reimers, Stian, City, University of London  
Reina, Christopher, Virginia Commonwealth University  
Reis, Filipa, Universidade Católica Portuguesa  
Reisinger, Markus, WHU–Otto Beisheim School of Management  
Reitzig, Markus, University of Vienna  
Rennekamp, Kristina, Cornell University  
Renucci, Antoine, Paris-Dauphine University  
Reschke, Brian, Brigham Young University  
Resutek, Robert, Univeristy of Georgia  
Rettl, Daniel, University of Georgia  
Reuben, Ernesto, New York University  
Reuter, Jonathan, Boston College  
Reza, Sadat, Nanyang Technological University  
Reza, Syed, Binghamton University  
Rhee, Chang-Han, Centrum Wiskunde en Informatica

## 2018 – All Reviewers

Rheingans-Yoo, Ross, Independent Researcher  
Rhodes, Andrew, Toulouse School of Economics  
Rice, Edward, University of Washington  
Rice, Sarah, Texas A&M University  
Richardson, Vernon, University of Arkansas  
Richter, Brian, University of Texas at Austin  
Rick, Scott, University of Michigan  
Rickle, Marketa, University of Iowa  
Rider, Christopher, Georgetown University  
Riener, Gerhard, University of Düsseldorf  
Rietveld, Joost, University College London  
Righi, Cesare, Boston University  
Rindi, Barbara, Bocconi University  
Rindisbacher, Marcel, Boston University  
Ringgenberg, Matthew, University of Utah  
Rink, Floor, University of Groningen  
Riordan, Ryan, Queen's University  
Rios, Luis, Duke University  
Rissing, Ben, Cornell University  
Rivas, Fernanda, Middle East Technical University Northern Cyprus Campus  
Roach, Michael, Cornell University  
Robertson, Scott, Boston University  
Robinson, Lawrence, Cornell University  
Robotti, Cesar, University of Warwick  
Roche, Herve, Universidad Adolfo Ibáñez  
Rock, Daniel, Massachusetts Institute of Technology  
Rockart, Scott, Duke University  
Roels, Guillaume, INSEAD  
Roende, Thomas, Copenhagen Business School  
Roet-Green, Ricky, University of Rochester  
Rogers, Todd, Harvard University  
Rogo, Rafael, University of British Columbia  
Rohde, Kirsten, Erasmus University Rotterdam  
Roeder, Andreas, University of Regensburg  
Romero, Gonzalo, University of Toronto  
Ronayne, David, University of Oxford  
Rong, Ying, Shanghai Jiaotong University  
Rosendahl Huber, Laura, University of Amsterdam  
Rosokha, Yaroslav, Purdue University  
Rossi, Alberto, University of Maryland, College Park  
Rossi, Marco, Texas A&M University  
Rossi, Stefano, Bocconi University  
Roszbach, Kasper, Norges Bank  
Roussellet, Guillaume, McGill University  
Routledge, Bryan, Carnegie Mellon University  
Roy, Abhishek, University of Texas at Austin  
Roychowdhury, Sugata, Boston College  
Ru, Hong, Nanyang Technological University  
Ruan, Tianyue, National University of Singapore  
Rubel, Olivier, University of California, Davis  
Rubineau, Brian, McGill University  
Rudin, Cynthia, Duke University  
Ruffle, Bradley, Wilfrid Laurier University  
Rui, Huaxia, University of Rochester  
Rujeerapaiboon, Napat, National University of Singapore  
Rusmevichientong, Paat, University of Southern California  
Russo, Dan, Columbia University  
Rutherford, Ronald, University of South Florida  
Ryan, Chris, University of Chicago  
Ryzhov, Ilya, University of Maryland, College Park  
Saavedra, Daniel, University of California, Los Angeles  
Saban, Daniela, Stanford University  
Saccardo, Silvia, Carnegie Mellon University  
Sadoff, Sally, University of California, San Diego  
Saeedi, Maryam, Carnegie Mellon University  
Safadi, Hani, University of Georgia  
Saffi, Pedro, Cambridge University  
Sahin, Ozge, Johns Hopkins University  
Sahni, Navdeep, Stanford University  
Sahoo, Nachiketa, Boston University  
Saidi, Farzad, Stockholm School of Economics  
Saint-Jacques, Guillaume, Massachusetts Institute of Technology  
Salazar, Maritza, University of California, Irvine  
Salmon, Tim, Southern Methodist University  
Salomon, Robert, New York University  
Salva, Carolina, University of Neuchatel  
Samila, Sampsa, IESE Business School  
Samorodnitsky, Gennady, Cornell University  
Sampat, Bhaven, Columbia University  
Sanati, Ali, University of Minnesota  
Sanchez-Pages, Santiago, University of Barcelona  
Sandberg, Anna, Institute for International Economic Studies  
Sandikci, Burhaneddin, University of Chicago  
Sandino, Tatiana, Harvard University

## 2018 – All Reviewers

Sangiorgi, Francesco, Frankfurt School of Finance & Management  
Sanjurjo, Adam, Universidad de Alicante  
Sankaraguruswamy, Srinivasan, National University of Singapore  
Sannino, Francesco, Frankfurt School of Finance & Management  
Santalo, Juan, IE Business School  
Santos, Joao, Federal Reserve Bank of New York  
Santosh, Shrihari, University of Maryland, College Park  
Sanyal, Pallab, George Mason University  
Saouma, Richard, Michigan State University  
Saretto, Alessio, University of Texas at Dallas  
Sariri, Amir, University of Toronto  
Sarkissian, Sergei, McGill University  
Satopaa, Ville, INSEAD  
Sauermann, Henry, European School of Management and Technology  
Saure, Denis, University of Pittsburgh  
Sausgruber, Rupert, University of Economics and Business  
Sautner, Zacharias, Frankfurt School of Finance & Management  
Sauvagnat, Julien, Bocconi University  
Savaskan, Canan, Southern Methodist University  
Savor, Pavel, DePaul University  
Savva, Nicos, London Business School  
Sayed, Amin, University of Washington  
Sayin, Serpil, Koç University  
Scarsini, Marco, LUISS Guido Carli  
Schaeck, Klaus, University of Bristol  
Schafer, Larissa, Frankfurt School of Finance & Management  
Scharlemann, Terese, Office of Financial Research  
Scheibehenne, Benjamin, University of Geneva  
Scherbina, Anna, University of California, Davis  
Schilke, Oliver, University of Arizona  
Schill, Michael, University of Virginia  
Schilling, Melissa, New York University  
Schipper, Burkhard, University of California, Davis  
Schlag, Karl, University of Vienna  
Schlapp, Jochen, Frankfurt School of Finance & Management  
Schloetzer, Jason, Georgetown University  
Schmalz, Martin, University of Michigan  
Schmeling, Maik, Goethe University  
Schmid, Lukas, Duke University  
Schmidt, Daniel, HEC Paris  
Schmidt, Glen, University of Utah  
Schmidt, William, Cornell University  
Schmitt, Claus, Erasmus University  
Schmutte, Ian, University of Georgia  
Schnedler, Wendelin, University of Paderborn  
Schneider, Andres, Federal Reserve Board  
Schneider, Frederic, University of Cambridge  
Schneider, Henry, Cornell University  
Schoenfeld, Jordan, Georgetown University  
Schofield, Heather, University of Pennsylvania  
Scholnic, Barry, University of Alberta  
Scholnick, Barry, University of Alberta  
Scholten, Marc, Universidade Europeia  
Scholten, Patrick, Bentley University  
Scholtes, Stefan, University of Cambridge  
Schonlau, Rob, Brigham Young University  
Schöttner, Anja, Humboldt University Berlin  
Schreier, Martin, Vienna University of Economics and Business  
Schreyer, Dominik, WHU–Otto Beisheim School of Management  
Schroder, Mark, Broad College of Business  
Schroeder, Joe, Indiana University  
Schroth, Enrique, University of London  
Schuckers, Michael, St. Lawrence University  
Schudy, Simeon, Ludwig Maximilian University of Munich  
Schuerhoff, Norman, University of Lausanne  
Schuett, Florian, Tilburg University  
Schumacher, Heiner, Aarhus University  
Schwaab, Bernd, European Central Bank  
Schwardmann, Peter, University of Munich  
Schwartz, Daniel, University of Chile  
Schwartz, Eric, University of Michigan  
Schwartz, Janet, Tulane University  
Schwartzstein, Josh, Harvard Business School  
Schwartz-Ziv, Miriam, Michigan State University  
Schwarz, Chris, University of California, Irvine  
Schweidel, David, Emory University  
Schweizer, Nikolaus, Tilburg University  
Schwenkler, Gustavo, Boston University  
Schwert, Michael, University of Pennsylvania  
Scott, Sydney, Washington University in St. Louis

## 2018 – All Reviewers

Scur, Daniela, Massachusetts Institute of Technology  
Seaborn, Paul, University of Denver  
Seal, Jayanta Kumar, Independent Researcher  
Seamans, Robert, New York University  
Seasholes, Mark, Hong Kong University of Science and Technology  
Sebald, Alexander, University of Copenhagen  
Secomandi, Nicola, Carnegie Mellon University  
Sefton, Martin, University of Nottingham  
Segal, Gill, University of North Carolina at Chapel Hill  
Segev, Danny, University of Haifa  
Seiler, Stephan, Stanford University  
Seira, Enrique, Istanbul Şehir University  
Sela, Aner, University of Florida  
Selove, Matthew, Chapman University  
Sembenelli, Alessandro, University of Torino  
Sen, Rik, University of New South Wales  
Senot, Claire, Tulane University  
Serfling, Matthew, University of Tennessee  
Serpa, Juan, McGill University  
Serra-Garcia, Marta, University of California, San Diego  
Serrano, Carlos, Pompeu Fabra University  
Sertsios, Giorgio, University of the Andes  
Servaes, Henri, London Business School  
Severino, Felipe, Dartmouth College  
Sevilir, Merih, Indiana University  
Seybert, Nick, University of Maryland, College Park  
Shaffer, Greg, University of Rochester  
Shafieezadeh-Abadeh, Soroosh, École polytechnique fédérale de Lausanne  
Shah, Rachna, University of Minnesota  
Shahriar, Quazi, San Diego State University  
Shahrokhi Tehrani, Shervin, University of Texas at Dallas  
Shaikh, Sarah, University of Washington  
Shalev, Ron, New York University  
Shalvi, Shaul, University of Amsterdam  
Shamir, Noam, Tel Aviv University  
Shang, Guangzhi, University of South Carolina  
Shankar, Venkatesh, Texas A&M University  
Shapiro, Bradley, University of Chicago  
Shapiro, Dmitry, University of North Carolina at Charlotte  
Shapiro, Joel, University of Oxford  
Shaposhnik, Yaron, University of Rochester  
Sharma, Siddhartha, Carnegie Mellon University  
Sharp, Nathan, Texas A&M University  
Shcherbakov, Oleksandr, Washington University in St. Louis  
Shechter, Steven, University of British Columbia  
Sheer, Lia, Duke University  
Shen, Luxi, Chinese University of Hong Kong  
Shen, Qiaowei, Peking University  
Shen, Siqian, University of Michigan  
Shen, Yao, Baruch College  
Sheneman, Amy, Ohio State University  
Shenoy, Jaideep, University of Connecticut  
Sheppard, Kevin, University of Oxford  
Sheremeta, Roman, Case Western Reserve University  
Sherman, Eliot, London Business School  
Shevlin, Terry, University of California, Irvine  
Shi, Cong, University of Michigan  
Shi, Mengze, University of Toronto  
Shi, Peng, University of Southern California  
Shi, Pengyi, Purdue University  
Shi, Wei, Indiana University  
Shi, Yuan, University of Maryland, College Park  
Shi, Zhan (Michael), Arizona State University  
Shi, Zhan, Tsinghua University  
Shi, Zhen, Georgia State University  
Shiller, Ben, Brandeis University  
Shin, Hyoduk, University of California, San Diego  
Shin, Jiwoong, Yale University  
Shin, Woochoel, University of Florida  
Shive, Sophie, University of Notre Dame  
Shore, Jesse, Boston University  
Shou, Biying, City University of Hong Kong  
Shriver, Scott, Columbia University  
Shroff, Nemit, Massachusetts Institute of Technology  
Shroff, Pervin, University of Minnesota  
Shu, Pian, Georgia Institute of Technology  
Shu, Susan, Boston College  
Shu, Tao, University of Georgia  
Shue, Kelly, Yale University  
Shulman, Jeffrey, University of Washington  
Shum, Stephen, City University of Hong Kong  
Shunko, Masha, University of Washington  
Sibilkov, Valeriy, University of Wisconsin–Milwaukee

## 2018 – All Reviewers

Siddiq, Auyon, University of California, Los Angeles  
Siegel, Jordan, University of Michigan  
Siemens, Enno, University of Minnesota  
Silberholz, John, University of Michigan  
Silva, Rui, London Business School  
Silva-Gao, Lucia, University of Massachusetts Boston  
Simintzi, Elena, University of North Carolina at Chapel Hill  
Simmons, Joseph, University of Pennsylvania  
Simons, Kenneth, Rensselaer Polytechnic Institute  
Simsek, A. Serdar, University of Texas at Dallas  
Singer, Zvi, HEC Paris  
Singh, Harpreet, University of Texas at Dallas  
Singh, Shubhranshu, Johns Hopkins University  
Singh, Siddharth Prakash, Carnegie Mellon University  
Singhvi, Somya, Massachusetts Institute of Technology  
Sinha, Amitabh, Amazon  
Sinkinson, Michael, University of Pennsylvania  
Sirignano, Justin, University of Illinois at Urbana-Champaign  
Sivanathan, Niro, London Business School  
Sivaramakrishnan, Shiva, Rice University  
Skandari, Reza, University of Chicago Medical Center  
Skiera, Bernd, Goethe University Frankfurt  
Skiti, Tedi, Temple University  
Skoulakis, Georgios, University of British Columbia  
Skreta, Vasiliki, New York University  
Skrzypacz, Andrzej, Stanford University  
Sletten, Ewa, Boston College  
Slivkins, Aleksandrs, Microsoft Research  
Sliwka, Dirk, University of Cologne  
Sloof, Randolph, University of Amsterdam  
Small, Christopher, University of Toronto  
Smeers, Yves, Catholic University of Louvain  
Smeets, Paul, Maastricht University  
Smith, Erin, U.S. Securities and Exchange Commission  
Smith, J. Reed, Indiana University  
Smith, Jared, North Carolina State University  
Smith, John, Indiana University  
Smith, Kevin, Stanford University  
Smith, Sarah, Bristol University  
Smolin, Alex, University of Bonn  
Snellman, Kaisa, INSEAD  
Snyder, Jason, University of Utah  
So, Eric, Massachusetts Institute of Technology  
Soberman, David, University of Toronto  
Sockin, Michael, University of Texas at Austin  
Söderlind, Paul, University of St. Gallen  
Sodomka, Eric, Facebook  
Sohoni, Milind, Indian School of Business  
Soliman, Mark, University of Southern California  
Soll, Jack, Duke University  
Solomon, David, Boston College  
Soman, Dilip, University of Toronto  
Sommer, Svenja, HEC Paris  
Song, Changcheng, Singapore Management University  
Song, Hummy, University of Pennsylvania  
Song, Inseong, Seoul National University  
Song, Miao, Hong Kong Polytechnic University  
Song, Yicheng, University of Minnesota  
Song, Yingda, Shanghai Jiao Tong University  
Song, Zhaogang, Johns Hopkins University  
Sonmez, Erkut, University of Nebraska-Lincoln  
Soo, Cindy, University of Michigan  
Sobic, Greys, University of Southern California  
Sotes-Paladino, Juan, University of Melbourne  
Soumis, François, GERAD École Polytechnique de Montréal  
Sovinsky, Michelle, University of Mannheim  
Soyer, Refik, George Washington University  
Spalt, Oliver, Tilburg University  
Spann, Martin, Ludwig Maximilian University of Munich  
Spann, Martin, University of Munich  
Spantig, Lisa, University of Munich  
Spiegel, Matthew, Yale University  
Spiegel, Yossi, Tel Aviv University  
Spiller, Stephen, University of California, Los Angeles  
Spindler, Martin, University of Hamburg  
Sprenger, Charles, Stanford University  
Sridhar, Shrihari, Texas A&M University  
Sridharan, Suhas, Emory University  
Sridharan, Swaminathan, Northwestern University  
Srinivasan, Raji, University of Texas at Austin  
Sriram, S., University of Michigan

## 2018 – All Reviewers

Srivastava, Anup, University of Calgary  
Srivastava, Sameer, University of California, Berkeley  
Stahl, Florian, University of Mannheim  
Stamatopoulos, Ioannis, University of Texas at Austin  
Stanfield, Jared, University of New South Wales  
Stanton, Christopher, University of Utah  
Stanton, Richard, University of California  
Starr, Evan, University of Maryland, College Park  
Stecher, Jack, University of Alberta  
Steele, Logan, University of Wisconsin–Madison  
Stefanescu, Irina, Federal Reserve Board  
Steffen, Sascha, Frankfurt School of Finance & Management  
Steffensen, Mogens, University of Copenhagen  
Stegemoller, Michael, Baylor University  
Stein, Luke, Arizona State University  
Steinwender, Claudia, Massachusetts Institute of Technology  
Stephan, Paula, Georgia State University  
Stephen, Andrew, University of Oxford  
Sterling, Adina, Stanford University  
Serman, John, Massachusetts Institute of Technology  
Stern, Ariel, Harvard Business School  
Stewart, Neil, University of Warwick  
Stice, Derrald, Hong Kong University of Science and Technology  
Stidsen, Thomas, Technical University of Denmark  
Sting, Fabian, University of Cologne  
Stock, Axel, University of Central Florida  
Stoffman, Noah, Indiana University  
Stolletz, Raik, University of Mannheim  
Stoop, Jan, Erasmus University Rotterdam  
Stouraitis, Aristotelis, Hong Kong Baptist University  
Stourm, Valeria, HEC Paris  
Strack, Philipp, University of California, Berkeley  
Strauss, Jack, University of Denver  
Strobl, Günter, Frankfurt School of Finance & Management  
Stubben, Stephen, University of Utah  
Stueber, Robert, WZB Berlin Social Science Center  
Subasi, Musa, University of Maryland, College Park  
Subrahmanyam, Avaniidhar, University of California, Los Angeles  
Subramanian, Krishnamurthy, Indian School of Business  
Subramanian, Upender, University of Texas at Dallas  
Subramanyam, Ramanath, University of Illinois at Urbana–Champaign  
Sudbury, Austin, Carnegie Mellon University  
Suen, Sze-chuan, University of Southern California  
Suen, Wing, University of Hong Kong  
Sulaeman, Johan, National University of Singapore  
Suleymanov, Elchin, University of Michigan  
Sulz, Sandra, Erasmus University Rotterdam  
Sun, Baohong, CKGSB  
Sun, Haoying, University of Kentucky  
Sun, Jian, Massachusetts Institute of Technology  
Sun, Monic, Boston University  
Sun, Peng, Duke University  
Sun, Qi, Shanghai University of Finance and Economics  
Sun, Tianshu, University of Southern California  
Sun, Yacheng, Tsinghua University  
Sun, Zhen, George Washington University  
Sun, Zheng, University of California, Irvine  
Sunar, Nur, University of North Carolina at Chapel Hill  
Sundaresan, Savitar, Imperial College London  
Sunde, Uwe, Ludwig Maximilian University of Munich  
Sunder, Jayanthi, University of Arizona  
Sunder, Shyam, Yale University  
Suominen, Matti, Aalto University  
Susarla, Anjana, Michigan State University  
Sussman, Abigail, University of Chicago  
Sutherland, Andrew, Massachusetts Institute of Technology  
Tafkov, Ivo, Georgia State University  
Tafti, Ali, University of Illinois at Chicago  
Tag, Joacim, Research Institute of Industrial Economics  
Tagaras, George, Aristotle University of Thessaloniki  
Tahbaz-Salehi, Alireza, Northwestern University  
Tahoun, Ahmed, London Business School  
Takeuchi, Kan, Hitotsubashi University

## 2018 – All Reviewers

Tambe, Prasanna, University of Pennsylvania  
Tamoni, Andrea, London School of Economics and Political Science  
Tan, Samuel, Singapore Management University  
Tan, Tom, Southern Methodist University  
Tandon, Vivek, National University of Singapore  
Taneri, Niyazi, National University of Singapore  
Tang, Dragon, University of Hong Kong  
Tang, Michael, New York University  
Tang, Qian, Singapore Management University  
Tang, Sammi, University of Miami  
Tang, Shaojie, University of Texas at Dallas  
Tang, Vicky, Georgetown University  
Tang, Yi, Fordham University  
Tang, Yuehua, University of Florida  
Tangirala, Subra, University of Maryland, College Park  
Tanrisever, Fehmi, Bilkent University  
Tarantino, Emanuele, University of Mannheim  
Tartari, Valentina, Copenhagen Business School  
Tasoff, Joshua, Claremont Graduate University  
Taub, Bart, University of Glasgow  
Taussig, Markus, Rutgers University  
Taylor, Greg, University of Oxford  
Taylor, Lucian, University of Pennsylvania  
Taylor, Sean, Facebook  
Tebaldi, Claudio, Bocconi University  
Tebbs, Joshua, University of South Carolina  
Teguia, Alberto, École polytechnique fédérale de Lausanne  
Tenney, Elizabeth, University of Utah  
Teo, Melvyn, Singapore Management University  
Teodorescu, Mike, Boston College  
Teodoridis, Florenta, University of Southern California  
Tereick, Benjamin, Erasmus University Rotterdam  
Tereyagoglu, Necati, Georgia Institute of Technology  
Terry, Stephen, Boston University  
Thakor, Richard, University of Minnesota  
Thakral, Neil, Brown University  
Thanassoulis, John, University of Warwick  
Thatcher, Jason, Clemson University  
Thayer, Amanda, University of Akron  
Thiele, Veikko, Queen's University  
Thirumalai, Sriram, Texas Christian University  
Thomadsen, Raphael, Washington University in St. Louis  
Thompson, James, University of Waterloo  
Thornock, Jake, Brigham Young University  
Thorp, Susan, University of Sydney Business School  
Thraves, Charles, University of Chile  
Tian, Mary, Federal Reserve Board  
Tice, Sheri, Tulane University  
Tilcsik, Andras, University of Toronto  
Tilson, Vera, University of Rochester  
Timmermann, Allen, University of California, San Diego  
Timoshenko, Artem, Massachusetts Institute of Technology  
Tinaiker, Surjit, University of Massachusetts Boston  
Tirunillai, Seshadri, University of Houston  
Tiwari, Ashish, University of Iowa  
Tiwari, Sunil, National University of Singapore  
Todri, Vilma, Emory University  
Toffel, Michael, Harvard Business School  
Tomar, Sorabh, Southern Methodist University  
Tong, Jordan, University of Wisconsin–Madison  
Tong, Shilu, Hong Kong University of Science and Technology  
Tonin, Mirco, Free University of Bozen-Bolzano  
Topaloglu, Huseyin, Cornell University  
Torgler, Benno, Queensland University of Technology  
Tortoriello, Marco, Bocconi University  
Toussaert, Severine, New York University  
Townsend, Richard, University of California, San Diego  
Trautmann, Stefan, Heidelberg University  
Traxler, Christian, Hertie School of Governance  
Trichakis, Nikolaos, Massachusetts Institute of Technology  
Trigilia, Giulio, University of Rochester  
Tripodi, Egon, European University Institute  
Troya Martinez, Marta, New Economic School  
Trueblood, Jennifer, Vanderbilt University  
Truong, Van-Anh, Columbia University  
Trusov, Michael, University of Maryland, College Park  
Tsanakas, Andreas, City, University of London  
Tsang, Albert, York University  
Tseng, Ayung, Indiana University Bloomington

## 2018 – All Reviewers

Tseng, Kevin, University of Kansas  
Tsoukalas, Gerry, University of Pennsylvania  
Tsoy, Anton, Einaudi Institute for Economics and Finance  
Tsui, David, University of Southern California  
Tu, Jun, Singapore Management University  
Tuchman, Anna, Northwestern University  
Tucker, Anita, Boston University  
Tulabandhula, Theja, University of Illinois at Chicago  
Tunca, Tunay, University of Maryland, College Park  
Turcic, Danko, Washington University in St. Louis  
Turel, Ofir, California State University, Fullerton  
Turner, John, University of California, Irvine  
Turocy, Theodore, University of East Anglia  
Turtle, Harry, Colorado State University  
Tvede, Mich, University of East Anglia  
Twedt, Brady, Indiana University  
Tyagi, Rajeev, University of California, Irvine  
Uetake, Kosuke, Yale University  
Ugander, Johan, Stanford University  
Uichanco, Joline, University of Michigan  
Ulku, Sezer, Georgetown University  
Ullrich, Hannes, University of Zurich  
Ulrich, Maxim, Karlsruhe Institute of Technology  
Ulu, Canan, Georgetown University  
Ungemach, Christoph, Technical University of Munich  
Uppari, Bhavani Shanker, INSEAD  
Urban, Daniel, Erasmus University Rotterdam  
Uribe, Jose, University of Michigan  
Urminsky, Oleg, University of Chicago  
Urquhart, Andrew, ICMA Centre  
Ursu, Raluca, New York University  
Uryasev, Stan, University of Florida  
Uysal, Vahap, DePaul University  
Vadovic, Radovan, Istanbul Şehir University  
Vakili, Keyvan, London Business School  
Valdes, Leon, University of Pittsburgh  
Valentini, Giovanni, University of Navarra  
Valta, Philip, University of Bern  
Van Binsbergen, Jules, University of Pennsylvania  
Van Buskirk, Andrew, Ohio State University  
van de Ven, Jeroen, University of Amsterdam  
Van den Abbeele, Alexandra, Katholieke Universiteit Leuven  
Van den Bulte, Christophe, University of Pennsylvania  
van der Lans, Ralf, Hong Kong University of Science and Technology  
van der Weele, Joel, University of Amsterdam  
van Leeuwen, Boris, Tilburg University  
Van Long, Ngo, McGill University  
Van Parys, Bart, Massachusetts Institute of Technology  
van Veldhuizen, Roel, WZB Berlin Social Science Center  
Vana, Prasad, London Business School  
Varas, Felipe, Duke University  
Vashishtha, Rahul, Duke University  
Vasnev, Andrey, University of Sydney  
Vasvari, Florin, London Business School  
Vayanos, Phebe, University of Southern California  
Vaysman, Igor, Baruch College  
Vaze, Vikrant, Dartmouth College  
Vedolin, Andrea, London School of Economics and Political Science  
Veenman, David, Amsterdam Business School  
Velo, Francisco, Imperial College Business School  
Velthuis, Raisa, Villanova University  
Venkataraman, Sriram, University of South Carolina  
Venkatesan, Rajkumar, University of Virginia  
Venugopalan, Raghu, University of Texas at Arlington  
Veraart, Luitgard, London School of Economics and Political Science  
Verbeek, Marno, Erasmus University  
Verbeke, Willem, Erasmus University Rotterdam  
Verbeke, Wouter, Vrije Universiteit Brussel  
Vergopoulos, Vassili, Paris School of Economics  
Verhoef, Peter, University of Groningen  
Verhoeven, Dennis, KU Leuven  
Vespa, Emanuel, University of California, Santa Barbara  
Vestman, Roine, Stockholm University  
Vettros, Dimitris, Southern Methodist University  
Vickery, James, Federal Reserve Bank of New York

## 2018 – All Reviewers

Vielma, Juan Pablo, Massachusetts Institute of Technology  
Vig, Vikrant, London Business School  
Vilkov, Grigory, Frankfurt School of Finance & Management  
Villa, Sebastian, Università della Svizzera italiana  
Villas-Boas, J. Miguel, University of California, Berkeley  
Villeneuve, Stephane, Toulouse School of Economics  
Viswanathan, S., Duke University  
Vitorino, Maria Ana, University of Minnesota  
Vladimirov, Vladimir, University of Amsterdam  
Vlassopoulos, Michael, University of Southampton  
Voigt, Guido, Otto von Guericke University Magdeburg  
Volfovsky, Alexander, Duke University  
Vollan, Björn, University Innsbruck  
von Bieberstein, Frauke, University of Bern  
von Essen, Emma, University of Aarhus  
von Siemens, Ferdinand, University of Frankfurt  
Vosgerau, Joachim, Bocconi University  
Vul, Ed, University of California, San Diego  
Vyas, Dushyant, University of Toronto  
Vyas, Dushyantkumar, University of Toronto  
Wager, Stefan, Stanford University  
Wagman, Liad, Illinois Institute of Technology  
Wagner, Alexander, University of Zurich  
Wagner, Christian, Copenhagen Business School  
Wagner, Hannes, Bocconi University  
Wagner, Michael, University of Washington  
Wagner, Stefan, European School of Management and Technology  
Wagner, Wolf, Tilburg University  
Waguespack, David, University of Maryland, College Park  
Wahid, Aida, University of Toronto  
Wahlen, James, Indiana University  
Wakker, Peter, Erasmus University  
Walasek, Lukasz, University of Warwick  
Waldfogel, Joel, University of Minnesota  
Waldinger, Fabian, University of Warwick  
Waldman, Michael, Cornell University  
Walker, Dylan, Boston University  
Walters, Daniel, INSEAD  
Walther, Ansgar, University of Warwick  
Wambach, Achim, Centre for European Economic Research  
Wan, Zhixi, University of Oregon  
Wang, Baolian, Fordham University  
Wang, Chao, University of Pennsylvania  
Wang, Charles, Harvard Business School  
Wang, Chen, Tsinghua University  
Wang, Chengsi, Monash University  
Wang, Chong (Alex), Peking University  
Wang, Cong, Chinese University of Hong Kong  
Wang, Dechun, Texas A&M University  
Wang, Gang, University of Delaware  
Wang, Hai, Singapore Management University  
Wang, He, Georgia Institute of Technology  
Wang, Jialan, University of Illinois at Urbana-Champaign  
Wang, Jianfu, Nanyang Technological University  
Wang, Jing, Hong Kong University of Science and Technology  
Wang, Jingqi, University of Hong Kong  
Wang, Jinting, Beijing Jiaotong University  
Wang, Kailong, University of Florida  
Wang, Kangkang, University of Alberta  
Wang, Liao, Columbia University  
Wang, LingLing, University of Connecticut  
Wang, Mengdi, Princeton University  
Wang, Philip, University of Florida  
Wang, Qinghai, University of Central Florida  
Wang, Qiong, University of Illinois  
Wang, Richard, Babson College  
Wang, Rong, Singapore Management University  
Wang, Ruxian, Johns Hopkins University  
Wang, Shouqiang, University of Texas at Dallas  
Wang, Tawei (David), DePaul University  
Wang, Tong, National University of Singapore  
Wang, Tracy, University of Minnesota  
Wang, Wenbin, Shanghai University of Finance and Economics  
Wang, X., University of Missouri  
Wang, Xiaoqun, Tsinghua University  
Wang, Xin, Hong Kong University of Science and Technology  
Wang, Xin, University of Hong Kong  
Wang, Xuan, Hong Kong University of Science and Technology  
Wang, Xue, Ohio State University  
Wang, Yajun, Baruch College  
Wang, Yanbo, National University of Singapore

## 2018 – All Reviewers

Wang, Yanwen, University of British Columbia  
Wang, Yihui, Fordham University  
Wang, Yimin, Arizona State University  
Wang, Yongxiang, University of Southern California  
Wang, Yu, California State University, Long Beach  
Wang, Yulan, Hong Kong Polytechnic University  
Wang, Zhi Jay, University of Oregon  
Wang, Zizhuo, University of Minnesota  
Warachka, Mitch, University of San Diego  
Ward, Colin, University of Minnesota  
Wardlaw, Malcolm, University of Texas at Dallas  
Warglien, Massimo, Ca' Foscari University of Venice  
Warusawitharana, Missaka, Federal Reserve Board  
Wason, James, Cambridge University  
Watson, Derrick, University of Warwick  
Wattal, Sunil, Temple University  
Watts, Susan, Purdue University  
Weagley, Daniel, Georgia Institute of Technology  
Webb, Alan, University of Waterloo  
Webb, Craig, University of Manchester  
Webb, Ryan, University of Toronto  
Weber, Matthias, University of Saint Gallen  
Weber, Stefan, Leibniz University Hannover  
Weber, Thomas, École polytechnique fédérale de Lausanne  
Wei, Kelsey, University of Texas at Dallas  
Wei, Mike, University at Buffalo  
Wei, Yanhao, University of Southern California  
Wei, Yehua, Boston College  
Wei, Zaiyan, Purdue University  
Weimann, Joachim, Otto von Guericke University Magdeburg  
Weinbaum, David, Syracuse University  
Weisbach, Michael, Ohio State University  
Weiss, Dan, Tel Aviv University  
Weller, Nicholas, University of California, Riverside  
Wen, Quan, Georgetown University  
Wen, Wen, University of Texas at Austin  
Wengström, Erik, Lund University  
Werner, Peter, Maastricht University  
Werner, Timothy, University of Texas at Austin  
Weyl, Glen, Microsoft Research  
Weymark, John, Vanderbilt University  
Whillans, Ashley, Harvard Business School  
White, Alexander, Tsinghua University  
White, Lawrence, New York University  
Whitson, Jennifer, University of California, Los Angeles  
Wibral, Matthias, University of Bonn  
Wickelgren, Abraham, University of Texas at Austin  
Wiesemann, Wolfram, Imperial College London  
Wiesen, Daniel, University of Cologne  
Wilbur, Kenneth, University of California, San Diego  
Wilde, Jaron, University of Iowa  
Wildenbeest, Matthijs, Indiana University  
Wilhelm, Hendrik, University of Cologne  
Wilkening, Tom, University of Melbourne  
Williams, Christopher, University of Michigan  
Williams, Jonathan, University of Georgia  
Williams, Ryan, University of Arizona  
Williamson, Rohan, Georgetown University  
Willis, Richard, Vanderbilt University  
Wilson, Alistair, University of Pittsburgh  
Wilson, Jared, Indiana University  
Wilson, Mungo, Oxford University  
Wilson, Ryan, University of Oregon  
Winer, Russell, New York University  
Winkler, Robert, Duke University  
Winter, Ralph, University of British Columbia  
Witkowski, Jens, Frankfurt School of Finance & Management  
Wittenberg-Moerman, Regina, University of Southern California  
Wolf, Michael, University of Zurich  
Wolfe, Brian, SUNY at Buffalo  
Wolfolds, Sarah, Cornell University  
Won, Shinjae, University of Illinois at Urbana-Champaign  
Wong, Laurence, University of Southern California  
Wong, M. H. Franco, University of Toronto  
Wong, Maisy, University of Pennsylvania  
Wong, Sze-Sze, Nanyang Technological University  
Wong, Yu Ting Forester, University of Southern California  
Wood, Wendy, University of Southern California  
Wooten, Joel, University of South Carolina

## 2018 – All Reviewers

Wozniak, David, Eastern Michigan University  
Wright, Julian, National University of Singapore  
Wu, Bingxiao, Rutgers University  
Wu, Brian, University of Michigan  
Wu, Cheng-Han, National Cheng Kung University  
Wu, Donghui, Chinese University of Hong Kong  
Wu, George, University of Chicago  
Wu, Jiahua, Imperial College London  
Wu, Julie, University of Nebraska–Lincoln  
Wu, Lynn, University of Pennsylvania  
Wu, Owen, Indiana University  
Wu, Qi, Case Western Reserve University  
Wu, Wei, Texas A&M University  
Wu, Weifang, Georgia State University  
Wu, Xiaole, Fudan University  
Wu, Yaozhong, National University of Singapore  
Wu, Yue, University of Pittsburgh  
Xia, Han, University of Texas at Dallas  
Xiang, Yi, China Europe International Business School  
Xiao, Erte, Monash University  
Xiao, Jun, University of Melbourne  
Xiao, Steven, University of Texas at Dallas  
Xiao, Wenqiang, New York University  
Xie, Fei, University of Delaware  
Xie, Hong, University of Kentucky  
Xie, Weijun, Virginia Polytechnic Institute and State University  
Xie, Xinchang, Duke University  
Xie, Ying, University of Texas at Dallas  
Xin, Linwei, University of Chicago  
Xing, Yuhang, Rice University  
Xiu, Dacheng, University of Chicago  
Xu, Joseph, Carnegie Mellon University  
Xu, Heng, American University  
Xu, Huan, National University of Singapore  
Xu, Huifu, University of Southampton  
Xu, Jiaming, Duke University  
Xu, Jin, Virginia Polytechnic Institute and State University  
Xu, Linli, University of Minnesota  
Xu, Lizhen, Georgia Institute of Technology  
Xu, Moqi, London School of Economics and Political Science  
Xu, Nancy, Boston College  
Xu, Tina, University of Wisconsin–Madison  
Xu, Ting, University of Virginia  
Xu, Yan, University of Hong Kong  
Xu, Yi, University of Maryland, College Park  
Xu, Yuqian, University of Illinois at Urbana–Champaign  
Xue, Chen, University of Cincinnati  
Xue, Hao, Duke University  
Xue, Ling, Georgia State University  
Yadav, Pradeep, University of Oklahoma  
Yalabik, Baris, University of Bath  
Yan, Dong, Stockholm School of Economics  
Yan, Hongjun, DePaul University  
Yan, Lu (Lucy), Indiana University  
Yan, Zhenzhen, Nanyang Technological University  
Yang, Baozhong, Georgia State University  
Yang, Bicheng, University of British Columbia  
Yang, Chen, ETH Zurich  
Yang, Fan, University of Connecticut  
Yang, Holly, Singapore Management University  
Yang, Liu, University of Maryland, College Park  
Yang, Liyan, University of Toronto  
Yang, Lusi, University of Arizona  
Yang, Luyi, Johns Hopkins University  
Yang, Ming, Duke University  
Yang, Mochen, Indiana University Bloomington  
Yang, Nan, University of Miami  
Yang, Nathan, McGill University  
Yang, S. Alex, London Business School  
Yang, Sha, University of Southern California  
Yang, Steve, Stevens Institute of Technology  
Yang, Tiantian, Duke University  
Yang, Yang, University of Florida  
Yang, Yinghui, University of California, Davis  
Yang, Yupin, Simon Fraser University  
Yang, Zhibin (Ben), University of Oregon  
Yang, Zoe, Chinese University of Hong Kong  
Yaniv, Ilan, Hebrew University of Jerusalem  
Yao, Chen, Chinese University of Hong Kong  
Yao, Lan, Shanghai University of Finance and Economics  
Yao, Song, University of Minnesota  
Yao, Tong, University of Iowa  
Yao, Vincent, Georgia State University  
Yaouanq, Yves, Ludwig Maximilian University of Munich  
Yaraghi, Niam, Central Connecticut State University  
Yavas, Abdullah, University of Wisconsin

## 2018 – All Reviewers

Yavuz, M. Deniz, Purdue University  
Ye, Shengqi, Indiana University  
Ye, Shun, George Mason University  
Yehezkel, Yaron, Tel Aviv University  
Yenkey, Chris, University of South Carolina  
Yermack, David, New York University  
Yerramilli, Vijay, University of Houston  
Yeung, Bernard, National University of Singapore  
Yeung, Catherine, Chinese University of Hong Kong  
Yezege, Ari, Bentley University  
Yi, Fan, National University of Singapore  
Yildirim, Pinar, University of Pennsylvania  
Yildiz, Muhamet, Massachusetts Institute of Technology  
Yildiz, Ozlem, University of Virginia  
Yin, Chengdong, Purdue University  
Yin, Pai-Ling, Massachusetts Institute of Technology  
Yin, Qianbo, Shanghai University of Finance and Economics  
Yin, Rui, Arizona State University  
Yoganarasimhan, Hema, University of Washington, Seattle  
Yohn, Teri, Indiana University  
Yom-Tov, Galit, Technion – Israel Institute of Technology  
Yonker, Scott, Cornell University  
Yoo, Onesun, University College London  
Yoon, Haewon, Boston University  
Yorulmazer, Tanju, University of Amsterdam  
Yost, Benjamin, Massachusetts Institute of Technology  
You, Haifeng, Hong Kong University of Science and Technology  
Younkin, Peter, University of Oregon  
Yu, Fan, Claremont McKenna College  
Yu, Gwen, Harvard Business School  
Yu, Jeff Jiewei, University of Arizona  
Yu, Jianfeng, Tsinghua University  
Yu, Jiayi, Tsinghua University  
Yu, Man, Hong Kong University of Science and Technology  
Yu, Peiwen, Fudan University  
Yu, Qiuping, Indiana University  
Yu, Sandy, University of Minnesota  
Yu, Yang (Gloria), Singapore Management University  
Yu, Yimin, City University of Hong Kong  
Yuan, Rong, JD.com  
Yuan, Yu, Shanghai Advanced Institute of Finance  
Yucel, Safak, Georgetown University  
Yue, Wei, City University of Hong Kong  
Yuksel, Sevgi, New York University  
Yun, Hayong, Michigan State University  
Yust, Christopher, Texas A&M University  
Zabojnik, Jan, Queen's University  
Zaccaria, Luana, Einaudi Institute for Economics and Finance  
Zacharias, Christos, University of Miami  
Zafar, Basit, Arizona State University  
Zakay, Dan, Interdisciplinary Center Herzliya  
Zaldokas, Alminas, Hong Kong University of Science and Technology  
Zaman, Tauhid, Massachusetts Institute of Technology  
Zambrana, Rafael, Universidade Nova de Lisboa Nova  
Zanarone, Giorgio, Colegio Universitario de Estudios Financieros  
Zang, Amy, Hong Kong University of Science and Technology  
Zapatero, Fernando, University of Southern California  
Zappa, Paola, National University of Ireland Maynooth  
Zarghamee, Homa, Barnard College  
Zawadowski, Adam, Central European University  
Zebedee, Allan, Clarkson University  
Zein, Jason, University of New South Wales  
Zeithammer, Robert, University of California, Los Angeles  
Zender, Jaime, University of Colorado  
Zeng, Bo, University of Pittsburgh  
Zeng, Jing, Frankfurt School of Finance & Management  
Zeng, Yao, University of Washington  
Zenger, Todd, University of Utah  
Zenteno, Cecilia, Massachusetts General Hospital  
Zepeda, E. David, Northeastern University  
Zervas, Georgios, Boston University

## 2018 – All Reviewers

Zhang, Dennis, University College London  
Zhang, Bin, University of Arizona  
Zhang, Bohui, Chinese University of Hong Kong, Shenzhen  
Zhang, Can, Duke University  
Zhang, Dan, University of Colorado Boulder  
Zhang, Dennis, Washington University in St. Louis  
Zhang, Feng, University of Utah  
Zhang, Frank, Yale University  
Zhang, Gaoqing, University of Minnesota  
Zhang, Hao, University of British Columbia  
Zhang, Harold, University of Texas at Dallas  
Zhang, Heng, University of Southern California  
Zhang, Hong, Tsinghua University  
Zhang, Hongzhong, Columbia University  
Zhang, Huai, Nanyang Technological University  
Zhang, Ivy, University of Minnesota  
Zhang, James, University of Texas at Dallas  
Zhang, Jenny, University of British Columbia  
Zhang, Jieying, University of Texas at Dallas  
Zhang, Jingjing, Indiana University  
Zhang, Jonathan, University of Washington  
Zhang, Laurina, Georgia Institute of Technology  
Zhang, Liandong, Singapore Management University  
Zhang, Lu, Ohio State University  
Zhang, Mandy, National University of Singapore  
Zhang, Mengzhenyu, University of Michigan  
Zhang, Miao, University of Southern California  
Zhang, Renyu, New York University Shanghai  
Zhang, Weina, National University of Singapore  
Zhang, Wenchang, University of Maryland, College Park  
Zhang, Xingtian, University of Colorado Boulder  
Zhang, Xinyu, Academy of Mathematics and Systems Science  
Zhang, Yinghao, University of Cincinnati  
Zhang, Yingjie, University of Texas at Dallas  
Zhang, Yinglei, Chinese University of Hong Kong  
Zhang, Yiwei, University of Chicago  
Zhang, Yue, Pennsylvania State University  
Zhang, Yuli, Beijing Institute of Technology  
Zhang, Yun, George Washington University  
Zhang, Yuzhao, Rutgers University  
Zhang, Zelin, Renmin University of China  
Zhang, Zhe, University of Texas at Dallas  
Zhao, Feng, University of Texas at Dallas  
Zhao, Minyuan, University of Pennsylvania  
Zhao, Shuchen, University of California, Santa Cruz  
Zhao, Wanli, Renmin University of China  
Zhao, Wuyang, University of Texas at Austin  
Zhao, Xiaofei, University of Texas at Dallas  
Zhao, Xuying, University of Notre Dame  
Zhao, Ying, Hong Kong University of Science and Technology  
Zhao, Yingshuai, University of Cologne  
Zheng, Fanyin, Columbia University  
Zheng, Jinyang, Purdue University  
Zheng, Lu, University of California, Irvine  
Zheng, Xiaojin, Tongji University  
Zheng, Xinhua, Hong Kong University of Science and Technology  
Zheng, Yanchong, Massachusetts Institute of Technology  
Zheng, Zeyu, University of California, Berkeley  
Zheng, Zhichao, Singapore Management University  
Zhong, Hongda, London School of Economics and Political Science  
Zhong, Yuan, University of Chicago  
Zhong, Zachary, University of Toronto  
Zhong, Zemin, University of California, Berkeley  
Zhong, Zhuo, University of Melbourne  
Zhou, Bobby, University of Maryland, College Park  
Zhou, Dexin, Emory University  
Zhou, Guofu, Washington University in St. Louis  
Zhou, Jian, University of Hawaii at Manoa  
Zhou, Jidong, Yale University  
Zhou, Sean, Chinese University of Hong Kong  
Zhou, Shuang (Frank), University of Pennsylvania  
Zhou, Wen, University of Hong Kong  
Zhou, Xing, Federal Reserve Board  
Zhou, Yangfang, Singapore Management University  
Zhou, Yuan, Indiana University Bloomington  
Zhou, Yun, McMaster University  
Zhu, Christina, University of Pennsylvania  
Zhu, David, Arizona State University  
Zhu, Feng, Harvard University  
Zhu, Qifei, Nanyang Technological University  
Zhu, Shushang, Sun Yat-Sen University  
Zhu, Ting, Purdue University

## 2018 – All Reviewers

Zhu, Weiming, University of Navarra  
Zhu, Yi, University of Minnesota  
Zia, Mohammad, Chapman University  
Zimmermann, Florian, University of Bonn  
Zipkin, Paul, Duke University  
Ziv, Amir, Columbia University  
Zorc, Sasa, INSEAD Asia Campus  
Zoumpoulis, Spyros, INSEAD  
Zryumov, Pavel, University of Pennsylvania  
Zubanov, Nikolay, Goethe University  
Zubcsek, Peter Pal, Tel Aviv University  
Zubizarretta, Jose, Harvard University  
Zucchi, Francesca, Federal Reserve Board  
Zultan, Ro'i, Ben-Gurion University of the Negev  
Zvilichovsky, David, Tel Aviv University  
Zwick, Eric, University of Chicago  
Zwick, Rami, University of California, Riverside
